# Supplementary material for: Mechanisms of PP2A-Ankle2 dependent nuclear reassembly after mitosis
Source: eLife journal article supplement (doi:10.7554/elife.104233), 2024-11-27
Supplement: fig4-data1 [file elife-104233-fig4-data1-v1.zip]

WCL

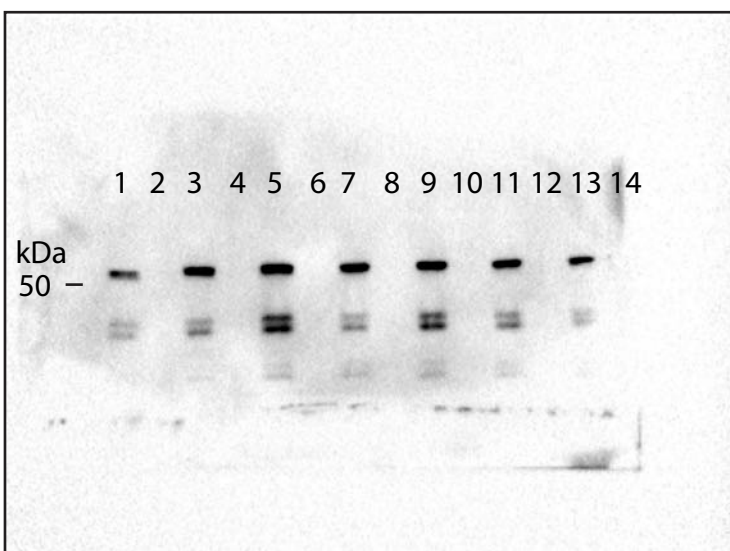

GFP purification

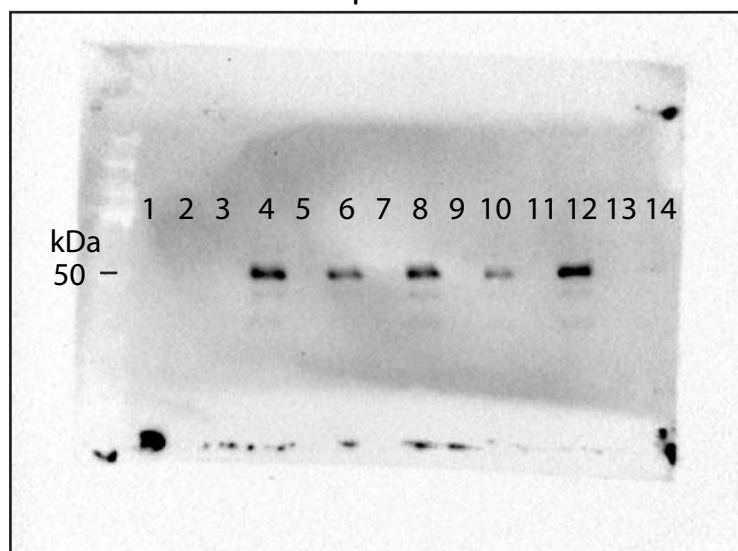 $\alpha$ -Myc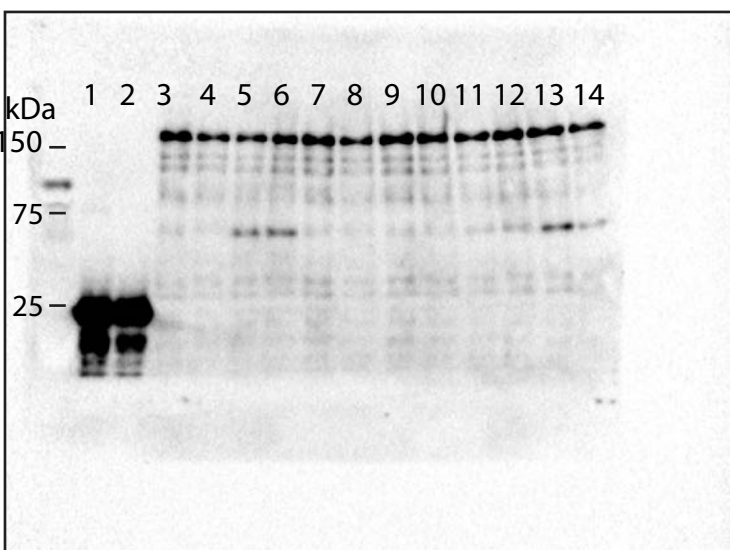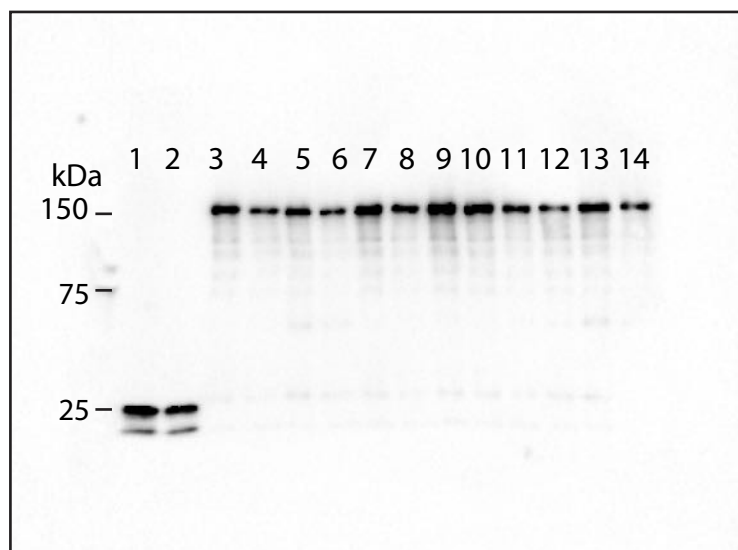 $\alpha$ -GFP

- 1: GFP-Flag
- 2: GFP-Flag+ Vap33-myc
- 3: Ankle2-GFP
- 4: Ankle2-GFP+Vap33-myc
- 5: Ankle2<sup>Fm</sup>-GFP
- 6: Ankle2<sup>Fm</sup>-GFP+Vap33-myc
- 7: Ankle2<sup>FL2m</sup>-GFP
- 8: Ankle2<sup>FL2m</sup>-GFP+Vap33-myc
- 9: Ankle2<sup>FL1m</sup>-GFP
- 10: Ankle2<sup>FL1m</sup>-GFP+Vap33-myc
- 11: Ankle2<sup>Fm+FL2m</sup>-GFP
- 12: Ankle2<sup>Fm+FL2m</sup>-GFP+Vap33-myc
- 13: Ankle2<sup>Fm+FL1m</sup>-GFP
- 14: Ankle2<sup>Fm+FL1m</sup>-GFP+Vap33-myc
