# Supplementary material for: Mechanisms of PP2A-Ankle2 dependent nuclear reassembly after mitosis
Source: eLife journal article supplement (doi:10.7554/elife.104233), 2024-11-27
Supplement: fig4-data1 [file elife-104233-fig4-data1-v1.zip]

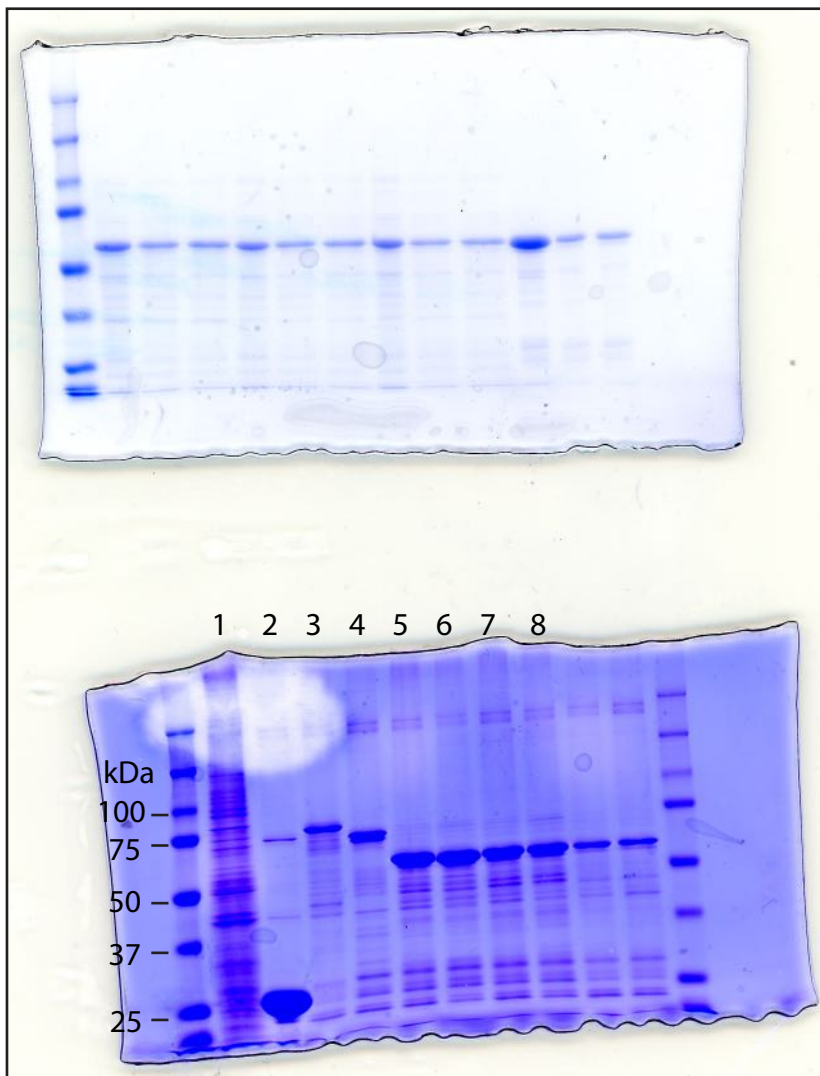

- 1: WCL
- 2: GST
- 3: GST-Ankle2 1-450
- 4: GST-Ankle2 451-909
- 5: GST-Ankle2 910-1174
- 6: GST-Ankle2 910-1174+Fm
- 7: GST-Ankle2 910-1174+FL2m
- 8: GST-Ankle2 910-1174+FL1m

CB

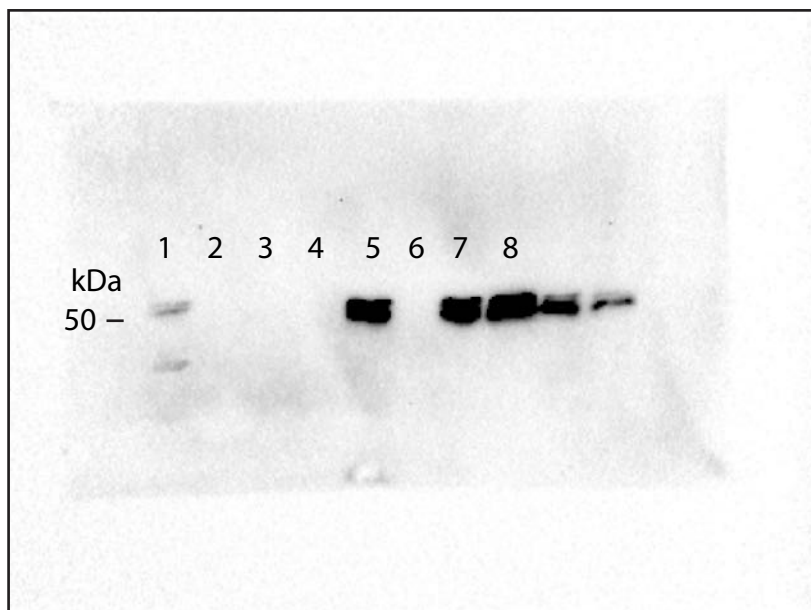

- 1: WCL
- 2: GST
- 3: GST-Ankle2 1-450
- 4: GST-Ankle2 451-909
- 5: GST-Ankle2 910-1174
- 6: GST-Ankle2 910-1174+Fm
- 7: GST-Ankle2 910-1174+FL2m
- 8: GST-Ankle2 910-1174+FL1m

$\alpha$ -Myc
