# Supplementary material for: Mechanisms of PP2A-Ankle2 dependent nuclear reassembly after mitosis
Source: eLife journal article supplement (doi:10.7554/elife.104233), 2024-11-27
Supplement: fig5-data2 [file elife-104233-fig5-data2-v1.zip]

$\alpha$ -Ankle2

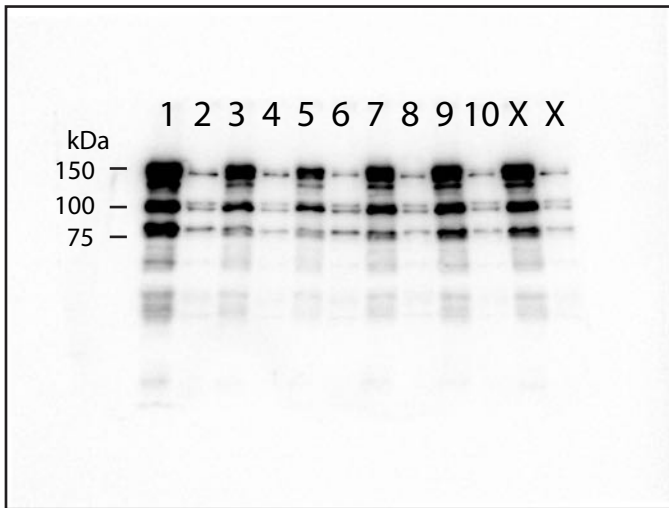

$\alpha$ -Tubulin

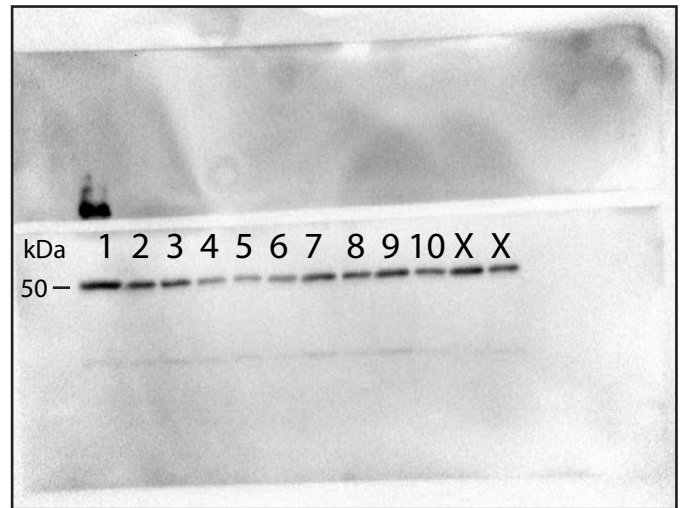

$\alpha$ -GFP

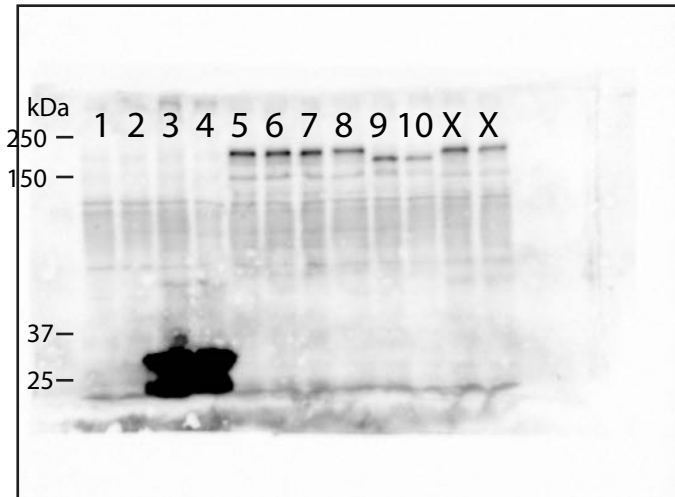

PhosTag+ $\alpha$ -BAF

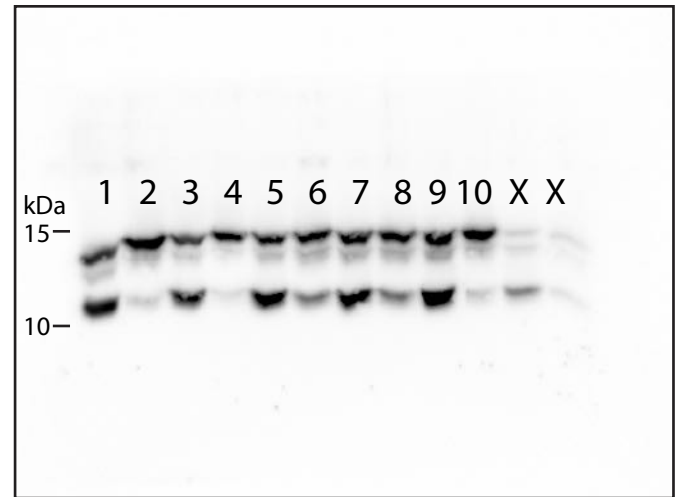

|                  |                                               |
|------------------|-----------------------------------------------|
| 1: dsRNA control | None                                          |
| 2: dsRNA Ankle2  |                                               |
| 3: dsRNA control | Flag-GFP                                      |
| 4: dsRNA Ankle2  |                                               |
| 5: dsRNA control | Ankle2 <sup>WT</sup> -GFP                     |
| 6: dsRNA Ankle2  |                                               |
| 7: dsRNA control | Ankle2 <sup>Fm+FL1m</sup> -GFP                |
| 8: dsRNA Ankle2  |                                               |
| 9: dsRNA control | Ankle2 <sup><math>\Delta</math>ANK</sup> -GFP |
| 10: dsRNA Ankle2 |                                               |
