# Supplementary material for: Mechanisms of PP2A-Ankle2 dependent nuclear reassembly after mitosis
Source: eLife. 2025 Feb 18;13:RP104233. doi: 10.7554/eLife.104233 (PMC11835388; doi:10.7554/eLife.104233)
Supplement: Figure 5—figure supplement 1—source data 1. [file elife-104233-fig5-figsupp1-data1.xlsx]

## Sheet: Panel B
Left:
		dsRNA Ctrl			dsRNA Ankle2
		N1	N2	N3	N1	N2	N3
Ankle2-GFP +	None	4	5	6	97	96	97
	WT	3	4.3	6.7	11	11	5
	Fm+FL1m	2	6.7	4	13	7	13
	Fm+FL1m & 51-1174	2.6	8	8	16	13	15
	1-587	4	5	3	78	82	78
	588-1174	2.6	7	4	85	89	88
	232-415 del	3.3	4.7	6.7	85	70	77
	607-680 del		7.6	5		84	80
	992-1040 del	5	6.7	6	47	44	54
Middle:
		dsRNA Ctrl			dsRNA Ankle2
		N1	N2	N3	N1	N2	N3
Ankle2-GFP +	None	3.3	5.7	6.7	90	93	95
	WT	5.3	5	6.7	8	9	7.3
	232-275 del	5	3.3	4.7	62	62	48
	681-937 del	4.7	3.7	5	22	29	20
	938-997 del	3.3	3.7	5	27	29	29
	938-1040 del	4	6.7	5.7	75	53	47
Right:
		dsRNA Ctrl			dsRNA Ankle2
		N1	N2	N3	N1	N2	N3
Ankle2-GFP +	None	10	4,7	9	87	93	90
	WT	11	5,7	7.7	17	11	15
	938-1040	8	6,7	10	84	83	89
	401-692 del	9.3	7,3	9	76	85	80
	938-997 del + 401-692 del	3.3	3,7	5	81	88	83
	992-1040 del + 401-692 del	4.7	5	8.3	78	77	89
	1-692	6.7	5	6	65	76	78
	1-937	5	7	6.3	83	87	79
	1-1040	9	6	8	22	14	24
