# Supplementary material for: Mechanisms of PP2A-Ankle2 dependent nuclear reassembly after mitosis
Source: eLife. 2025 Feb 18;13:RP104233. doi: 10.7554/eLife.104233 (PMC11835388; doi:10.7554/eLife.104233)
Supplement: Figure 5—source data 1. [file elife-104233-fig5-data1.xlsx]

## Sheet: Fig 5C
	dsRNA ctrl						dsRNA Ankle2
	N1	N2	N3	N4	N5	N6	N1	N2	N3	N4	N5	N6
None	4	5	6	4.667	4	1.333	97	96	97	95	95	96
Ankle2WT-GFP	3	4.3	6.7	3	3.333	3.667	11	11	5	10.333	3	3.333
Ankle2Fm+FL1m-GFP	2	6.7	4	6.667			13	7	13	13
Ankle2delANK-GFP	3.3	4.7	6.7	3			85	70	77	85
