# Supplementary material for: Mechanisms of PP2A-Ankle2 dependent nuclear reassembly after mitosis
Source: eLife. 2025 Feb 18;13:RP104233. doi: 10.7554/eLife.104233 (PMC11835388; doi:10.7554/eLife.104233)
Supplement: Figure 6—figure supplement 2—source data 1. [file elife-104233-fig6-figsupp2-data1.xlsx]

## Sheet: Panel B
	Interphase			Metaphase
	Ankle2 RNAi, Ankle2WT-GFP	Ankle2 RNAi, Ankle2delANK-GFP	Ankle2 RNAi, Ankle2Fm+FL1m-GFP	Ankle2 RNAi, Ankle2WT-GFP	Ankle2 RNAi, Ankle2delANK-GFP	Ankle2 RNAi, Ankle2Fm+FL1m-GFP
cell 1	1.108142	1.408487	1.255069	1.985113	1.869708	1.333227
cell 2	1.158766	1.356692	1.233358	1.864594	1.570331	1.348072
cell 3	1.476833	1.103645	1.231914	1.739394	1.420839	1.455501
cell 4	1.517639	1.094747	1.215616	1.835558	1.867783	1.561186
cell 5	1.42287	1.123656	1.186383	1.782749	0.815855	1.396375
cell 6	1.573061	1.125154	1.195322	1.783325	0.771976	1.446512
cell 7	1.42053	1.126634	1.145153	1.751599	1.909058	1.145153
cell 8	1.370888	1.532353	1.240199	1.959988	2.135818	1.240199
cell 9	1.398932	1.133213	1.154591	1.874966	2.033373	1.253533
cell 10	1.421302	1.300238	1.149526	1.948218	1.900376	1.330891
cell 11	1.407792	1.109632	1.191547	2.037945	1.971917	1.418661
cell 12	1.467539	1.555888	1.179044	1.860149	2.090815	1.191014
cell 13	1.294123	1.45387	1.182232	1.653713	2.200018	1.316385
cell 14	1.339642	1.513287	1.143317	2.148592	2.51798	1.346118
cell 15	1.317903	1.486493	1.193016	2.050871	2.040672	1.402638
