# Supplementary material for: Mechanisms of PP2A-Ankle2 dependent nuclear reassembly after mitosis
Source: eLife. 2025 Feb 18;13:RP104233. doi: 10.7554/eLife.104233 (PMC11835388; doi:10.7554/eLife.104233)
Supplement: Figure 6—source data 1. [file elife-104233-fig6-data1.xlsx]

## Sheet: Fig 6C
	Ankle2 RNAi, Ankle2WT-GFP
Time (s)	Division 1	Division 2	Division 3	Division 4	Division 5	Division 6	Division 7	Division 8	Division 9	Division 10
0	0	0	0	0	0	0	0	0	0	0
10	261.6506703	4.009151488	-8.005182073	97.06902646	-4.712103175	351.4505257	44.88918919	10.60144124	157.8812009	26.38011182
20	694.9716356	9.165473107	-18.39053737	50.94777033	-12.31337992	651.5888356	218.1161696	53.25776053	346.8580756	63.50880759
30	490.5868866	16.36200754	-28.32445199	119.7155676	104.8280999	323.5215677	634.5288833	165.1843126	1043.548766	216.8895458
40	355.3991131	3.041462926	65.26463684	185.3809974	142.885119	199.3219642	409.916149	765.7168492	1224.264879	841.1432516
50	266.5564841	58.25031502	407.6757885	513.1665802	425.6426301	155.4471032	228.8421715	1797.025261	1033.015195	1198.885894
60	248.8383023	220.4853371	1272.028326	987.7188933	579.8628571	94.37757235	224.160438	859.2750229	937.1121582	1944.679201
70	225.7983807	573.880005	3073.595648	1016.636379	243.9296429	97.82297464	239.2181081	660.7972326	703.1415746	1125.05814
80	209.8677438	368.8170519	1836.198723	1001.878979	227.0930791	69.05154607	227.2816074	513.4362917	554.0111914	973.5241722
90	169.9201257	242.2884527	1273.97903	939.063569	186.5450893	25.27505497	217.7382239	536.2227701	351.2121888	800.8162043
100	134.7153236	256.9631558	985.5761825	866.5922445	129.5332868	18.42270968	165.1820166	530.1018736	260.4973346	614.5253117
110	109.1627367	236.9785716	707.3376751	642.3948737	146.7173452	51.37101457	144.7088122	523.0572019	328.1370351	458.0538793
120	105.162671	227.2772612	554.3095572	372.0955228	114.3465293	18.55241187	124.3310811	468.5174401	230.5425705	474.0636176
	Ankle2 RNAi, Ankle2Fm+FL1m-GFP
Time (s)	Division 1	Division 2	Division 3	Division 4	Division 5	Division 6	Division 7	Division 8	Division 9	Division 10
0	0	0	0	0	0	0	0	0	0	0
10	-5.90625	-36.86235294	4.105509356	-7.800396169	-0.202777778	-24.17079452	0.445652174	-12.12876254	-8.647875817	-3.068045113
20	14.45104167	-43.68277383	-14.24506237	-2.757103486	-6.003333333	-15.69112155	-14.25	-24.51337793	-7.192810458	2.2357364
30	36.05625	-34.37236743	-31.66658004	-16.26679704	-7.145555556	-0.702863978	-29.19646687	-28.68645485	-21.59477124	9.101282618
40	29.07371663	-21.63996162	-34.48674636	-3.538374795	11.75379875	5.726140351	-43.36833004	2.483277592	-2.075980392	246.3720404
50	132.3191476	9.274384761	-20.15696466	24.11067572	1.213787538	2.767165992	-17.39931986	92.60598959	26.48288614	690.3782752
60	394.0436815	77.72459745	21.93685031	101.8805375	24.84222222	56.99628636	-7.044801274	261.1885053	139.0391733	992.9041771
70	722.3126283	255.9194771	70.4737526	196.4017289	52.77131125	56.22614035	149.41026	617.5588764	223.7688752	816.7139149
80	279.0523555	637.9788235	567.4187278	209.9370192	115.0182775	396.9029377	492.1625385	511.4096305	282.9312092	1106.768514
90	234.3902234	946.0108306	1610.079676	148.07217	157.4079621	961.2980886	1116.369103	248.6403113	152.0839869	568.5849338
100	185.774975	629.0222712	1777.972983	93.98881127	101.9587264	2261.47915	1027.616889	179.1149351	117.9515965	468.6164497
110	149.4875242	360.5215175	529.3356722	122.9909121	93.77744861	1077.880469	563.6092391	138.484353	58.17654163	451.5292414
120	158.9423907	177.2609626	388.0831015	114.7677816	78.04820048	726.1322604	257.0121237	101.333194	36.60120915	366.7931421
	Ankle2 RNAi, Ankle2delANK-GFP
Time (s)	Division 1	Division 2	Division 3	Division 4	Division 5	Division 6	Division 7	Division 8	Division 9	Division 10
0	0	0	0	0	0	0	0	0	0	0
10	-4.245762712	-8.091347271	-27.5842774	-40.50326537	-3.486206897	-37.67633229	-23.7486631	-40.15	-24.77490616	-52.40319772
20	-7.274781715	-11.92587108	-38.67054501	-54.14766484	-24.0424569	-30.47766458	-51.18538324	-48.09666667	-2.85712622	-33.87760697
30	1.715065913	-4.528637266	-44.41228652	-29.23944805	-22.00458972	-24.0380094	-35.21089127	-25.73666667	13.05152027	-8.48515367
40	27.57985476	22.02527361	-38.94417058	-22.09469281	-12.79417305	-32.84111808	-21.02532895	-19.35190476	13.13777174	-40.51226779
50	237.1814742	43.10736625	-45.49400601	-21.79700812	2.695740969	-35.91772132	-29.62160205	-26.26690476	24.5818506	-53.4951315
60	181.6317687	50.86379496	-57.75731402	29.12022425	43.91348737	-48.9384454	32.22487904	-6.082619048	46.71155303	-37.79254729
70	134.8590711	88.32106714	-27.05636865	121.8825549	184.1295599	-63.52538482	75.18421068	1.975555556	66.68845721	-20.59427626
80	134.038181	152.1131266	-3.978611754	322.1442425	206.8065435	-20.94607512	188.5738286	47.64106227	132.253799	-15.11716851
90	72.35953416	264.167918	125.4921716	519.01413	207.4936204	82.27912794	263.2545009	62.95365262	175.6410098	85.48728852
100	94.62034536	282.6502736	167.3831361	373.260989	207.6309953	231.8222957	363.5793346	133.87	154.1341912	92.72366483
110	117.7956466	208.432927	155.6975755	292.6195403	168.5053254	404.5365726	483.2559715	252.1776923	125.4419107	162.7615996
120	91.59629976	167.1402003	189.0938014	266.142286	106.1454987	368.589185	323.7592395	315.1914286	105.5881569	159.5181723

## Sheet: Fig 6D
	Ankle2 RNAi, Ankle2WT-GFP
Time (s)	Division 1	Division 2	Division 3	Division 4	Division 5	Division 6	Division 7	Division 8	Division 9	Division 10
0	0	0	0	0	0	0	0	0	0	0
10	81.90528185	30.37648044	18.43300162	14.81892809	-6.72281746	82.77094929	-26.92432432	-25.85449002	93.29472372	30.63312266
20	200.0583437	1.007973944	-18.27825907	-52.61044082	-37.34932712	165.6746327	-4.355452004	-36.37333703	29.02329412	92.61030331
30	358.8496307	23.82802638	-148.8123535	-29.90408158	89.93150068	241.4239332	156.2954559	-9.882206208	166.450484	135.43927
40	347.4028482	-49.33657734	-172.6498739	-45.84825619	99.63735994	163.1626155	295.7897028	27.64108244	201.2825073	178.3764261
50	266.8956922	-75.89165878	-176.325137	-10.90503066	99.51944746	172.5441933	292.8896552	214.5514094	224.6584409	195.4636157
60	255.009058	-31.44191344	-28.52919777	108.5110387	136.8360714	163.7088451	242.2316869	356.8999017	336.4340477	310.8825373
70	201.8100831	123.772806	67.01023654	140.0905177	157.5645238	117.7228024	154.2827027	252.2956846	196.1296644	149.7238104
80	286.5847022	193.4295107	34.04566007	123.0178356	160.7208727	134.2961194	174.6298862	194.9659723	167.915089	156.4701675
90	198.091375	237.7037791	26.10570576	125.994409	138.2174107	127.4672233	136.5145646	170.7458183	168.2725423	139.1185152
100	110.7752231	285.1127719	29.36382449	92.2776971	71.90695409	-15.80994498	66.45623701	223.1981984	132.8100563	88.75906504
110	106.0809983	116.5198441	20.13733618	88.62623476	51.22618215	26.86242527	39.59206223	185.2302575	180.8882676	55.32514944
120	115.061475	110.5952755	-79.92361213	55.15618325	27.64305861	-0.281611246	31.73758044	152.9732801	90.78204202	14.60208188
	Ankle2 RNAi, Ankle2Fm+FL1m-GFP
Time (s)	Division 1	Division 2	Division 3	Division 4	Division 5	Division 6	Division 7	Division 8	Division 9	Division 10
0	0	0	0	0	0	0	0	0	0	0
10	-31.3359375	-51.45941176	-36.26507277	1.706791718	-26.16388889	-72.72151643	-22.74782609	-78.13043478	-20.70261438	-2.331203008
20	-51.41510417	-44.13208545	-76.66060291	-5.676744867	-8.593888889	-53.71362782	-57.02554348	-111.9799331	-7.785947712	0.397368421
30	-92.94739583	-35.68160823	-94.74012474	-5.152667319	-15.99722222	-57.84831397	-56.36699184	-131.4874582	-8.22875817	13.16375498
40	-114.0750299	-39.95324982	-118.6351351	-31.54921405	-19.14428715	-54.42623604	-39.89604743	-155.687291	-40.28839869	-29.61699095
50	-140.3929442	-79.27784703	-120.6455301	-46.28538843	-33.01658408	-86.23684211	-57.07057018	-174.8924067	-57.71972824	-21.52617054
60	-142.5242635	-91.53002711	-128.1096674	-61.12124541	-58.97277778	-64.38036494	-35.86452569	-194.9166853	-62.8481754	-16.39945698
70	-134.5691323	-113.1449237	-175.8199064	-57.30171827	-55.75114217	-106.3946852	-59.67514101	-180.0978504	-67.35985675	-46.66748801
80	-190.3305114	-66.31117647	-204.3675553	-61.10073183	-55.84509524	-38.98520812	-69.2587548	-199.218311	-61.41511438	-50.9685302
90	-206.3185304	-53.19283394	-161.8825023	-75.05562505	-56.20756742	-52.21262795	-42.84340471	-230.4063794	-89.60400327	-74.8097827
100	-218.7225865	-84.74217912	-140.6162492	-79.25968357	-65.68158962	49.38650446	-25.65720282	-255.6276477	-91.68873888	-105.0633093
110	-225.2649274	-126.2669874	-274.6282445	-92.09888864	-71.08064273	-22.76594098	-7.232101449	-284.9790116	-90.96682296	-95.29995979
120	-222.5623169	-149.6593869	-303.1280032	-91.82128746	-79.61933575	-52.06468416	-64.28876812	-292.4513657	-93.57316993	-117.3144042
	Ankle2 RNAi, Ankle2delANK-GFP
Time (s)	Division 1	Division 2	Division 3	Division 4	Division 5	Division 6	Division 7	Division 8	Division 9	Division 10
0	0	0	0	0	0	0	0	0	0	0
10	-20.19491525	-6.932549361	-5.034598898	-12.84941922	-15.21637931	-27.72798574	-15.07333333	-1.940594542	12.82161473	-28.40086207
20	-15.67642527	-10.93493031	-2.979715248	-35.51811018	-24.18705805	-39.39661319	-33.02	3.072330671	-38.31129712	-26.02272727
30	-23.72085687	-34.37346143	-45.21104817	-73.74381868	-13.29276288	-60.52855615	-31.82666667	26.02675439	-27.72266185	-18.63205329
40	4.142463213	-1.521422988	-44.09196605	-101.840497	-31.50186782	-48.60683639	-33.83119048	-3.382753623	-33.43277745	-39.37207419
50	357.2299345	-13.24098568	-37.20904945	-129.8213936	-8.113474959	-77.73061497	-37.67404762	-4.00462963	-26.89577903	-102.6380185
60	293.2813257	-6.636114753	-51.3576031	-95.55372959	7.320322106	-3.120741024	-88.32119048	54.50075758	-47.81881523	-112.9498303
70	244.8323085	19.72679938	-69.8445989	-27.33722527	108.3577813	17.67588786	-78.4937037	33.08430799	-75.42921987	-127.3322064
80	200.7116828	85.65717798	-37.19656632	71.96219502	163.6343961	100.2107716	-67.28761905	184.4620915	-7.662375838	-126.259926
90	140.7653154	151.8282551	38.57192364	202.2451557	169.1919153	101.5090909	-23.78054917	141.0698343	-39.60035664	-103.3711662
100	140.9034319	147.9019973	118.3301417	242.8850275	133.4884731	104.7238668	25.82666667	236.2261438	100.9291772	14.05717518
110	103.378206	141.9262812	107.2948307	232.8267994	122.8023215	222.7885494	47.04525641	120.5093567	177.5564928	83.3908046
120	99.7201961	113.3155161	115.559222	223.6482106	69.39728666	179.4316399	92.74809524	194.3388889	164.4656564	67.15141066

## Sheet: Fig 6E
	Ankle2 RNAi, Ankle2WT-GFP
Time (s)	Division 1	Division 2	Division 3	Division 4	Division 5	Division 6	Division 7	Division 8	Division 9	Division 10
0	274.0968826	42.51803861	185.1493634	119.2353816	158.2055695	259.6219221	145.9144034	313.2135028	245.7445681	378.9552165
10	194.0276629	35.23570525	169.637775	104.3164019	148.8585156	274.0978102	123.4487309	328.5889487	250.9272605	326.3651716
20	183.3815271	5.146830574	207.4656454	100.5695877	112.3576571	213.2962532	134.351459	282.0618239	122.8594148	294.0681918
30	88.66362782	-18.7617827	234.0846053	94.36724507	76.26425318	234.6759845	107.9912753	274.7854484	166.2214579	254.4555077
40	41.23285973	-42.57266416	230.1404088	84.05750575	69.17857255	257.435197	73.46346203	218.1618676	53.37377531	260.7713349
50	47.03643484	-63.75129686	204.6253501	68.01109292	53.80375758	196.8950379	62.0753668	166.7219463	86.53732818	217.173715
60	-14.5994469	-79.30998256	100.9197093	13.24339297	61.96996367	160.9943703	32.9791203	173.165072	59.55323884	134.4352172
70	-19.17409148	-89.24055882	82.94897571	1.216334595	50.46150089	84.67598447	18.52135886	119.4396009	-15.30704823	66.88400913
80	-57.19594156	-112.4878726	68.38463775	-13.70122987	28.10079419	74.83081572	18.31046528	90.78286231	-100.9520439	67.74378863
90	-75.16093358	-103.4918613	17.66330176	-34.81078103	-1.214419408	63.82853409	6.017598696	33.01348378	-120.6141084	43.18029765
100	-70.85032468	-86.52196935	3.492439349	-40.2980818	12.93518551	-15.86286513	13.84927105	32.75992446	-124.2851951	32.21260712
110	-108.4723371	-63.26141866	-24.88955145	-47.59820634	2.731117272	29.9298776	0.894176319	26.18914172	-44.48323735	35.6366702
120	-94.01181078	-105.573083	-73.41758059	-67.83858167	12.20155952	-7.955936673	-10.62905405	20.5146997	-99.86141665	-1.236369019
	Ankle2 RNAi, Ankle2Fm+FL1m-GFP
Time (s)	Division 1	Division 2	Division 3	Division 4	Division 5	Division 6	Division 7	Division 8	Division 9	Division 10
0	113.3392386	41.10116126	186.2466162	97.37454862	51.66603175	204.9185429	95.55433717	88.97675845	93.44662268	129.2096106
10	93.15235702	32.24319202	182.0255983	82.91321342	42.8606746	191.6412251	67.7799782	91.1113164	80.4934272	78.79996466
20	89.39811188	24.07048427	197.991308	78.38846852	40.36335317	177.9824942	66.8809871	80.96401183	64.7507063	50.12033873
30	108.9840774	36.25165565	167.2307618	83.8673582	52.01223552	160.1551586	53.95395067	76.48697027	75.41364734	9.622614228
40	92.80675054	40.53300819	158.0425538	84.71879217	55.10147478	126.3830129	25.72909207	68.78430734	60.79573121	4.518938624
50	83.54284722	47.34350993	175.3946044	57.55774599	53.48258104	145.0689457	52.2071558	56.9138606	68.09299122	-2.802460697
60	49.86444371	10.14930051	154.2794866	17.95832354	51.65059068	131.2015191	42.42235934	44.74612344	35.36345553	-88.850829
70	38.90725952	-29.29364586	150.426808	-2.566742695	30.32071952	120.0640829	2.260814829	31.78735368	2.771064223	-130.4066898
80	17.04009534	-51.51403016	125.3481379	-19.82179778	23.96856934	102.0534422	-22.16511902	15.96741003	-19.13654447	-86.68968377
90	24.59947529	-64.61558294	43.78301331	-13.32395926	-17.34111111	73.20162546	-57.72961639	11.5584052	-13.8158923	-109.3186945
100	24.06049679	-35.5249137	9.791637336	-14.3025536	-2.285126555	139.5025562	-35.79302969	-23.74590233	-27.93271091	-94.95771422
110	13.88555072	-32.02694601	-12.91607407	-21.62391743	-2.217076362	185.3942849	-24.38814553	-33.36671229	30.0863343	-72.31481931
120	16.98251716	-42.78454586	-72.17295874	-14.07935361	-10.32831871	198.8697681	-20.54332111	-5.974647275	17.18796121	-93.21238948
	Ankle2 RNAi, Ankle2delANK-GFP
Time (s)	Division 1	Division 2	Division 3	Division 4	Division 5	Division 6	Division 7	Division 8	Division 9	Division 10
0	172.7703	118.6099	180.2913	108.5688	350.9967	191.869	203.3549	122.6857	194.4582	180.2274
10	178.7913	129.3076	158.7255	158.201	320.8832	167.4337	175.9042	108.3469	185.6125	190.6389
20	185.135	135.6858	154.1686	172.4119	366.6782	169.1343	184.3936	126.5283	152.2838	153.2068
30	197.8298	125.8647	152.2054	236.1979	388.3668	165.0819	191.7429	90.89884	154.3194	171.7847
40	223.4669	135.0877	117.1748	263.1395	382.1609	169.2373	154.0961	109.047	167.4415	147.6886
50	105.3235	143.6212	165.1778	236.7077	384.6021	179.1984	214.8315	122.1749	143.205	124.1944
60	88.53729	120.461	173.5905	201.1514	363.1153	183.0763	277.0292	147.6372	140.1214	137.7958
70	279.1706	129.2393	177.1267	158.5531	306.1878	186.9512	226.7192	140.2846	130.0056	105.7173
80	401.9176	147.4665	174.5996	85.73829	232.8188	167.7866	203.8798	90.15881	90.82386	94.24845
90	415.604	106.7379	79.24101	48.29414	221.518	139.5737	139.4575	101.1756	212.1242	35.93154
100	249.9543	41.39905	29.25461	32.21902	123.2448	92.42169	76.96321	92.62164	44.36747	18.67718
110	271.5315	51.39938	-57.2629	-2.56627	151.824	90.08782	35.5246	41.04471	55.50587	-21.2498
120	240.9651	11.48468	-162.483	3.637101	98.82542	47.77071	6.783153	48.14422	-30.3227	-42.1963

## Sheet: Fig 6F
	Ankle2 RNAi, Ankle2WT-GFP
Time (s)	Division 1	Division 2	Division 3	Division 4	Division 5	Division 6	Division 7	Division 8	Division 9	Division 10
0	732.0858812	938.1160605	712.852965	914.7594784	587.3121065	533.7590924	800.2486102	973.0780664	743.847227	1249.25852
10	672.3875241	786.7395787	658.4296883	845.4664382	496.1255013	540.5911015	619.54692	882.8613314	695.5594214	1054.607777
20	623.4305345	598.4279629	657.3976301	742.406352	427.5866379	427.0328439	581.5559659	735.9514082	414.8531627	893.5372004
30	499.4857644	506.5096911	609.6313997	663.8369725	390.0026942	331.0128772	518.6510155	592.4858625	484.5218912	739.226474
40	478.4022176	451.2694262	512.4925254	573.3540025	313.2057436	233.952951	380.2032947	574.6687493	254.3650183	588.5902533
50	411.5945843	395.3702928	419.751419	458.7904992	284.1123434	161.4917031	321.6531247	432.4695968	331.8879775	556.5755636
60	395.045407	222.9467421	275.6742554	368.4925228	174.2593078	131.7940365	230.6559698	374.6694054	300.3783219	361.8443822
70	356.6893827	163.4885205	235.805089	313.8369725	166.3360276	65.95312738	190.671509	269.1166075	172.4487863	301.8399194
80	273.4732951	121.3472078	123.7724393	226.9228543	122.2081169	-20.69604543	124.7017299	233.0864894	128.5328732	220.2588416
90	181.2952123	16.96709668	55.80434355	140.444087	39.70006266	-55.97988486	73.38871768	110.1897662	130.9958244	142.7702415
100	188.2123326	-17.71005517	50.32901952	78.26511669	4.559577922	-14.99390956	75.56855202	66.11575495	101.8028923	94.47767897
110	182.2772457	-41.84864261	-9.412585939	23.03700306	-15.9052005	12.47521036	60.47150901	47.99219357	75.71081859	47.00315468
120	146.510401	-146.1230043	-98.77055675	35.13005699	-46.51046366	-35.61017294	42.57182035	25.61424917	40.7096021	-4.561691262
	Ankle2 RNAi, Ankle2Fm+FL1m-GFP
Time (s)	Division 1	Division 2	Division 3	Division 4	Division 5	Division 6	Division 7	Division 8	Division 9	Division 10
0	353.4046913	221.7352823	422.5568085	373.8487762	130.7801984	364.9263202	397.4220916	199.8459875	285.0286722	138.6653171
10	270.6279065	197.3638382	368.1947244	286.7636069	125.7632341	353.9555372	294.4249574	148.0746315	214.4846872	86.04535377
20	161.5804381	157.8870164	350.1305539	205.188862	101.714127	294.8216149	271.1806086	93.54632899	123.2152013	52.04477102
30	62.37403274	142.1652908	297.9009741	68.12899046	77.90225546	240.4177179	222.6746934	-1.457158367	64.68270816	-15.1249759
40	-21.92677895	75.56279598	173.0369194	11.01350423	34.92677768	127.7447389	108.343258	-71.85382855	-11.9120915	-39.13058291
50	-129.2935378	-0.037029718	100.1527091	-32.82480492	-13.3683093	85.65096845	73.68900966	-138.3868767	-53.71891873	-54.44945698
60	-171.9864709	-66.46087348	-56.68125165	-65.59295673	-44.16946728	-17.79706938	15.39976002	-194.9530822	-83.34874964	-106.0877354
70	-190.2377727	-100.0515852	-156.2581366	-81.99489974	-47.65486578	-57.82722019	-47.28928793	-235.4406564	-99.63679312	-122.8660436
80	-215.9388506	-120.5833729	-221.3148073	-87.90760369	-68.98158104	-111.2977395	-62.87911899	-246.2013089	-87.24548878	-90.13666519
90	-218.6695939	-127.896097	-266.2064591	-88.42538364	-78.79674818	-112.1556856	-84.47975911	-255.5702374	-105.8976627	-100.2788221
100	-229.9566907	-129.232873	-293.2019904	-89.66886432	-78.66040648	-83.05886122	-91.18864555	-272.5846729	-105.5293247	-94.45857703
110	-220.1244229	-128.2103787	-307.4143132	-91.46442979	-75.29698949	-79.00325556	-41.31730938	-271.6805306	-97.68677914	-102.8809726
120	-217.2686077	-139.3602344	-316.3859223	-93.97733549	-67.08052632	-83.35028125	-45.89067575	-266.766224	-109.3220536	-110.0818524
	Ankle2 RNAi, Ankle2delANK-GFP
Time (s)	Division 1	Division 2	Division 3	Division 4	Division 5	Division 6	Division 7	Division 8	Division 9	Division 10
0	716.1908	595.3239	910.9115	668.9261	693.4633	698.7615	859.2847	612.9609	979.2568	1072.787
10	748.8742	617.5667	872.0284	865.3753	674.2826	645.9921	773.7473	555.347	978.3321	1014.098
20	629.2091	697.3799	850.5232	837.4755	628.8533	684.4544	778.9483	542.9544	811.5962	959.2409
30	503.8261	603.8035	793.1103	792.6451	535.0995	641.3336	663.9138	512.0949	878.5458	932.6852
40	408.31	501.3586	661.9974	680.6234	481.1545	655.9774	496.3957	477.3548	699.3242	815.5576
50	87.57931	370.897	613.7013	564.3648	430.7615	546.4673	484.6255	383.4606	646.9919	684.7333
60	17.18192	282.3212	528.9673	471.9332	354.4674	437.3809	502.8139	339.8915	466.0776	598.5278
70	47.23192	221.1284	369.4386	379.1927	316.3284	385.3428	417.3278	287.7772	487.7712	573.0299
80	143.3786	255.0855	348.7996	297.7806	213.5812	309.4765	444.2656	229.0511	314.9072	458.3813
90	223.5455	234.8816	231.4038	203.2124	183.9885	283.4106	339.4427	214.8734	232.6131	319.3157
100	164.3898	160.8695	184.433	174.4245	174.2084	207.3051	262.8728	181.1257	193.5479	244.8133
110	186.64	167.0978	124.0796	105.1548	114.49	221.1102	229.5145	161.3433	128.4305	162.0835
120	77.49442	94.0482	-15.5451	105.0967	102.0335	167.4324	179.0769	153.3204	116.9948	54.91602
