# Supplementary material for: Mechanisms of PP2A-Ankle2 dependent nuclear reassembly after mitosis
Source: eLife. 2025 Feb 18;13:RP104233. doi: 10.7554/eLife.104233 (PMC11835388; doi:10.7554/eLife.104233)
Supplement: Figure 7—figure supplement 1—source data 1. [file elife-104233-fig7-figsupp1-data1.xlsx]

## Sheet: Panel E
	No RNAi			Ankle2 RNAi
	N1	N2	N3	N1	N2	N3
Meiosis	0	0	0	10	2.63	0
Completed meiosis	0	0	0	4	10.53	10.53
1 mitotic nucleus	0	1.2	0	66	71.05	76.32
2 mitotic nuclei	0	0	0	16	7.89	5.26
>2 mitotic nuclei	90.91	98.8	100	0	2.63	5.26
Uncharacterizable	0	0	0	0	5.26	2.63
