# Supplementary material for: Mechanisms of PP2A-Ankle2 dependent nuclear reassembly after mitosis
Source: eLife. 2025 Feb 18;13:RP104233. doi: 10.7554/eLife.104233 (PMC11835388; doi:10.7554/eLife.104233)
Supplement: Figure 7—source data 1. [file elife-104233-fig7-data1.xlsx]

## Sheet: Fig 7A
	No RNAi				Ankle2 RNAi
	No transgene	Ankle2WT-GFP	Ankle2delANK-GFP	Ankle2Fm+FL1m-GFP	No transgene	GFP	Ankle2WT-GFP	Ankle2delANK-GFP	Ankle2Fm+FL1m-GFP
1	114	255	192	117	175	266	339	224	198
2	220	225	229	174	243	250	262	167	181
3	123	305	215	263	237	226	179	259	218
4	154	267	161	1	226	222	222	133	158
5	214	153	161	165	221	211	275	202	51
6	184	269	152	226	255	178	195	84	187
7	166	290	181	234	197	78	226	249	111
8	222	170	211	181	222	142	199	246	99
9	245	249	152	145	268	177	182	85	136
10	188	235	172	166	296	157	167	85	112

## Sheet: Fig 7B
	No RNAi				Ankle2 RNAi
	No transgene	Ankle2WT-GFP	Ankle2delANK-GFP	Ankle2Fm+FL1m-GFP	No transgene	GFP	Ankle2WT-GFP	Ankle2DANK-GFP	Ankle2Fm+FL1m-GFP
1	90.3508772	92.1568627	97.3958333	95.7264957	1.71428571	3.7593985	96.7551622	5.35714286	92.9292929
2	95.9090909	88.4444444	89.9563319	97.1264368	0	3.6	93.5114504	17.9640719	98.3425414
3	90.2439024	92.7868852	100	90.8745247	0.42194093	6.19469027	97.7653631	15.0579151	94.9541284
4	91.5584416	92.8838951	95.6521739	100	0	0.45045045	93.6936937	18.0451128	92.4050633
5	96.2616822	88.8888889	93.7888199	90.3030303	0.45248869	6.16113744	90.5454545	13.3663366	94.1176471
6	91.3043478	94.4237918	97.3684211	94.6902655	0.78431373	8.42696629	90.2564103	27.3809524	89.3048128
7	100	95.5172414	95.0276243	90.1709402	0	1.28205128	88.4955752	4.81927711	91.8918919
8	95.045045	89.4117647	98.1042654	90.6077348	0.9009009	7.74647887	94.4723618	7.72357724	89.8989899
9	95.9183673	93.9759036	86.1842105	95.862069	0.74626866	5.64971751	81.3186813	20	93.3823529
10	95.7446809	87.6595745	91.8604651	88.5542169	1.68918919	2.5477707	98.8023952	21.1764706	96.4285714

## Sheet: Fig 7C
	No RNAi				Ankle2 RNAi
	WT	Ankle2WT-GFP	Ankle2delANK-GFP	Ankle2Fm+FL1m-GFP	WT	GFP	Ankle2WT-GFP	Ankle2delANK-GFP	Ankle2Fm+FL1m-GFP
1	1.338	1.613	1.53	1.386	0	0	1.51	0	1.634
2	1.359	1.589	1.455	1.652	0	0	1.611	0	1.516
3	1.289	1.601	1.438	1.16	0	0	1.521		1.458
4	1.316	1.542	1.461	1.56		0	1.428		1.608
5	1.28	1.553	1.26	1.681		0	1.366		1.452
6	1.488	1.615	1.403	1.426		0	1.562		1.529
7	1.285	1.58	1.129	1.528		0	1.295		1.549
8	1.461	1.574	1.552	1.622		0	1.142		1.648
9	1.325	1.565	1.44	1.658		0	1.258		1.622
10	1.429	1.575	1.57	1.389		0	1.537		1.615
11	1.543	1.584	1.488	1.438		0	1.511		1.465
12	1.345	1.559	1.538	1.68		0	1.442		1.444
13	1.447	1.55	1.495	1.527		0	1.266		1.565
14	1.398	1.315	1.6	1.603		0	1.442		1.535
15	1.556	1.578	1.612	1.658		0	1.234		1.578
16	1.526	1.46	1.568	1.466		0	1.343		1.389
17	1.526	1.64				0	1.345		1.471

## Sheet: Fig 7D
	No RNAi				Ankle2 RNAi
1	WT	Vap33del20/+	Vap33del448/+	Vap33P-element/+	WT	Vap33del20/+	Vap33del448/+	Vap33P-element/+
2	1.231	1.676	1.333	1.512	0.478	0.327	0.106	0.197
3	1.314	1.473	1.41	1.285	0.469	0.249	0.229	0.127
4	1.367	1.603	1.468	1.49	0.337	0.072	0.242	0.272
5	1.707	1.613	1.717	1.483	0.491	0.352	0.168	0.17
6	1.338	1.61	1.672	1.298	0.675	0.19	0.298	0.354
7	1.35	1.683	1.583	1.572	0.501	0.312	0.26	0.304
8	1.467	1.675	1.549	1.518	0.392	0.309	0.114	0.195
9	1.553	1.596	1.409	1.577	0.389	0.287	0.274	0.248
10	1.637	1.722	1.605	1.53	0.541	0.274	0.24	0.244
11	1.439	1.539	1.531	1.326	0.459	0.188	0.249	0.305
12	1.534	1.577	1.621	1.648	0.474	0.311	0.205	0.444
13	1.396	1.641	1.524	1.126	0.485	0.129	0.253	0.203
14	1.549	1.652	1.335	1.532	0.516	0.258		0.197
15	1.467	1.535	1.426	1.164	0.692	0.271		0.204
16	1.58		1.378	1.575	0.544			0.142
17	1.541				0.51
18	1.605
