# Supplementary figures and images for: Mechanisms of PP2A-Ankle2 dependent nuclear reassembly after mitosis
Source: eLife journal article supplement (doi:10.7554/elife.104233), 2024-11-27

## WCL

## GFP purification

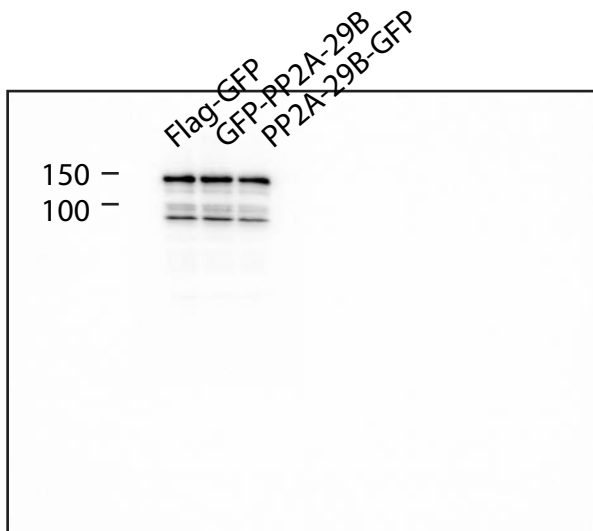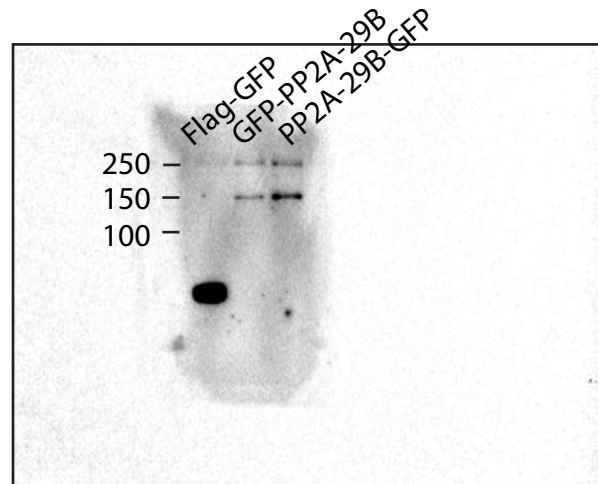

$\alpha$ -Ankle2

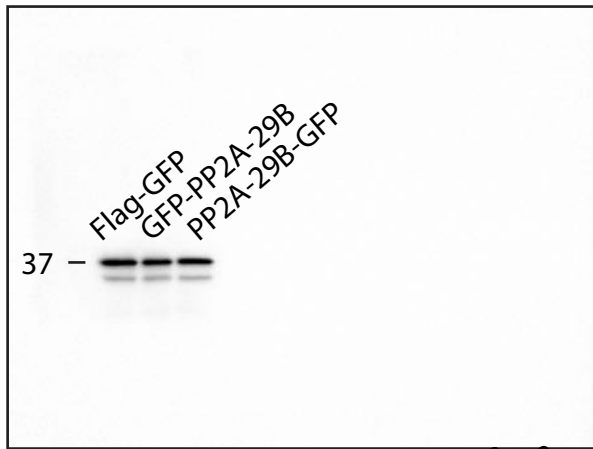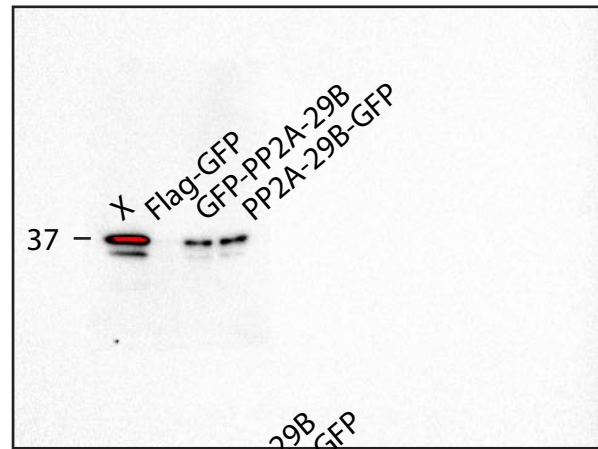

$\alpha$ -Mts

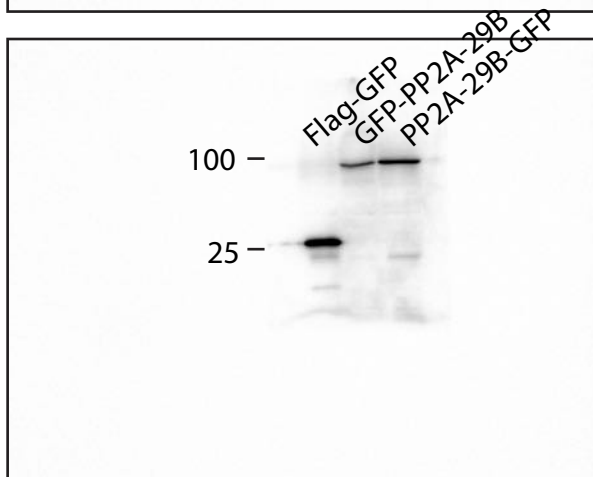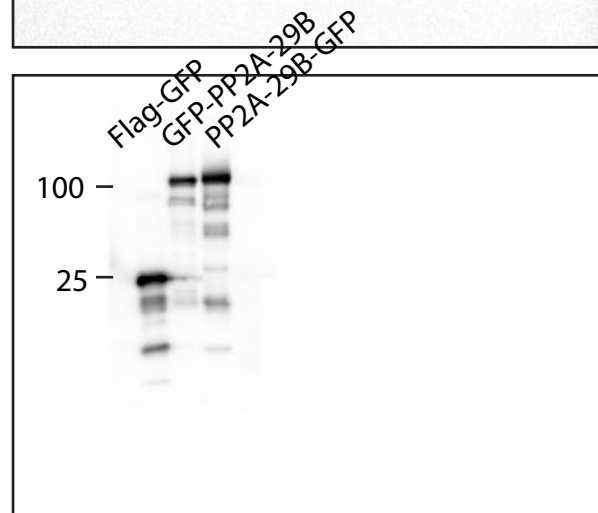

$\alpha$ -GFP

Supplement: fig1-data3 [file elife-104233-fig1-data3-v1.zip]

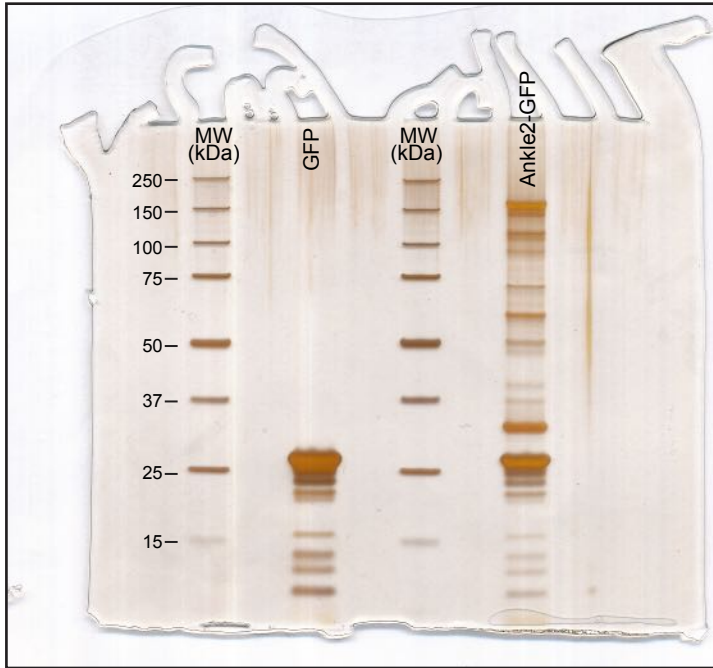

Silver staining

Supplement: fig1-data3 [file elife-104233-fig1-data3-v1.zip]

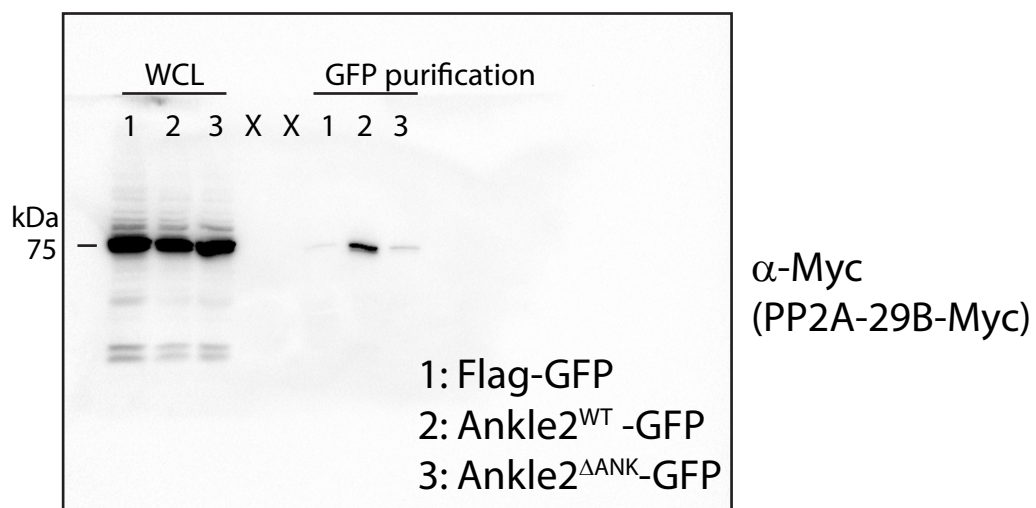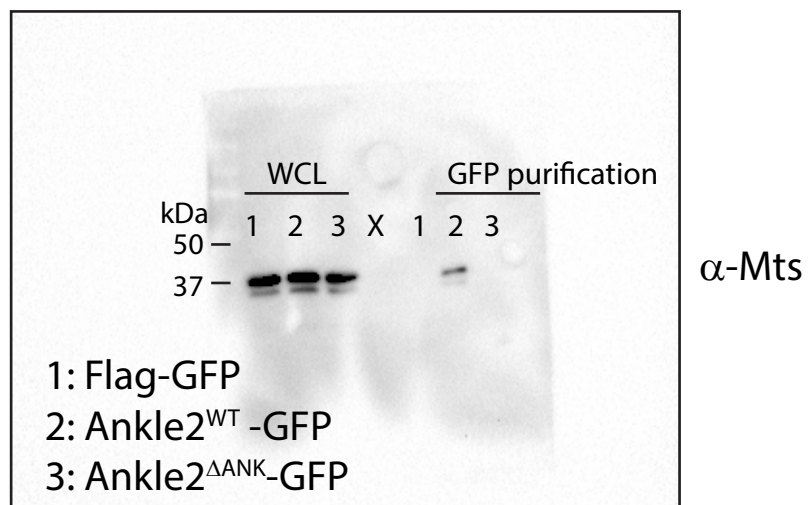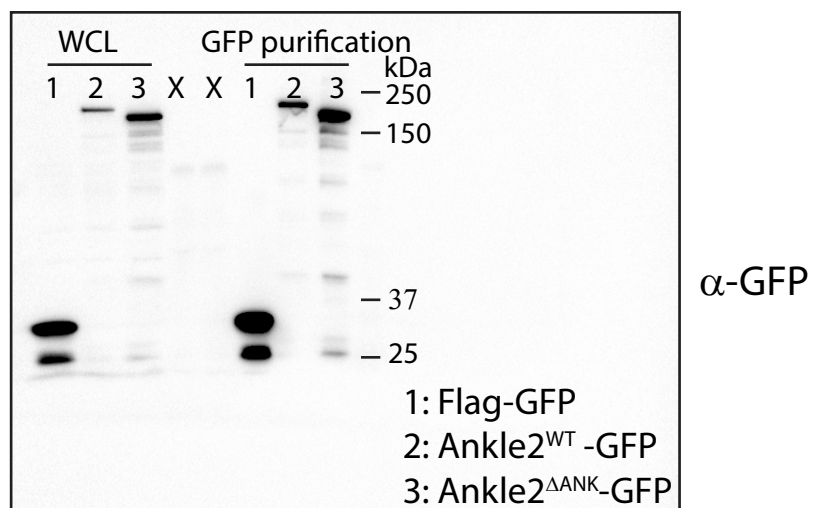

Supplement: fig1-data3 [file elife-104233-fig1-data3-v1.zip]

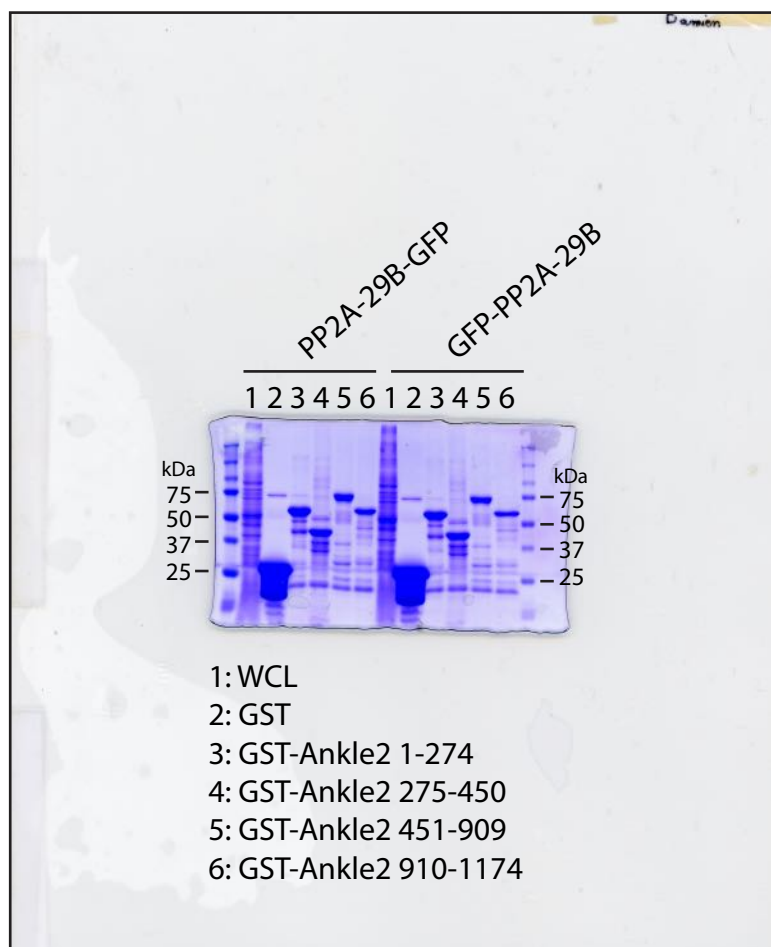

CB

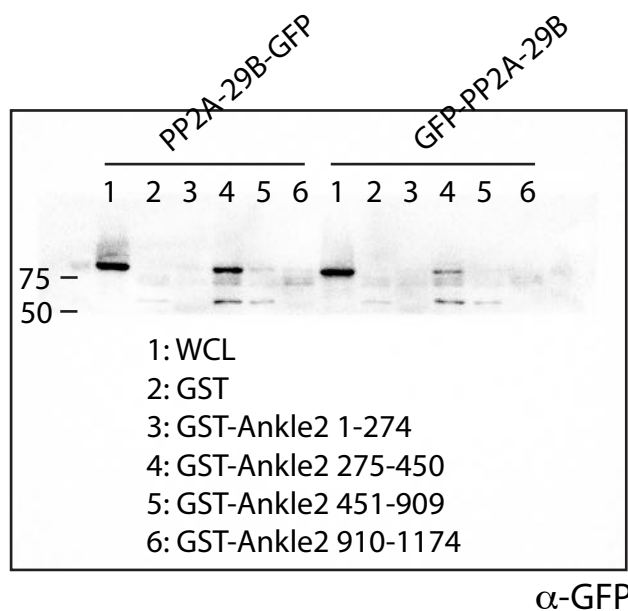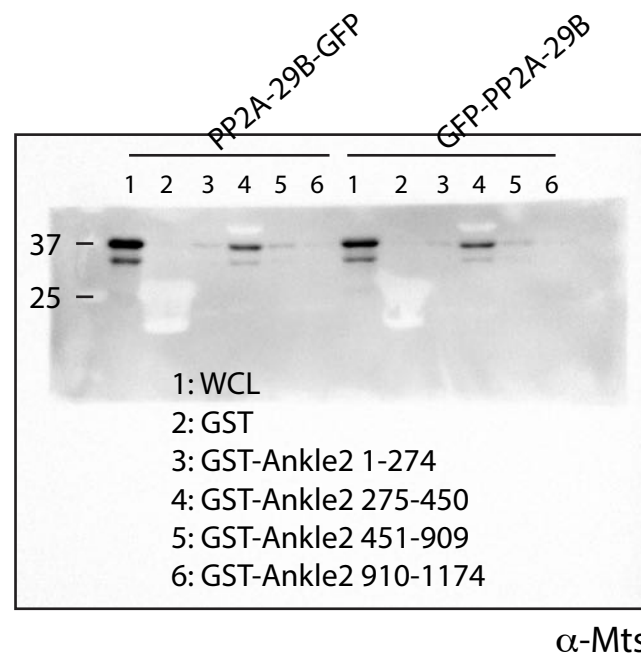

Supplement: fig1-data3 [file elife-104233-fig1-data3-v1.zip]

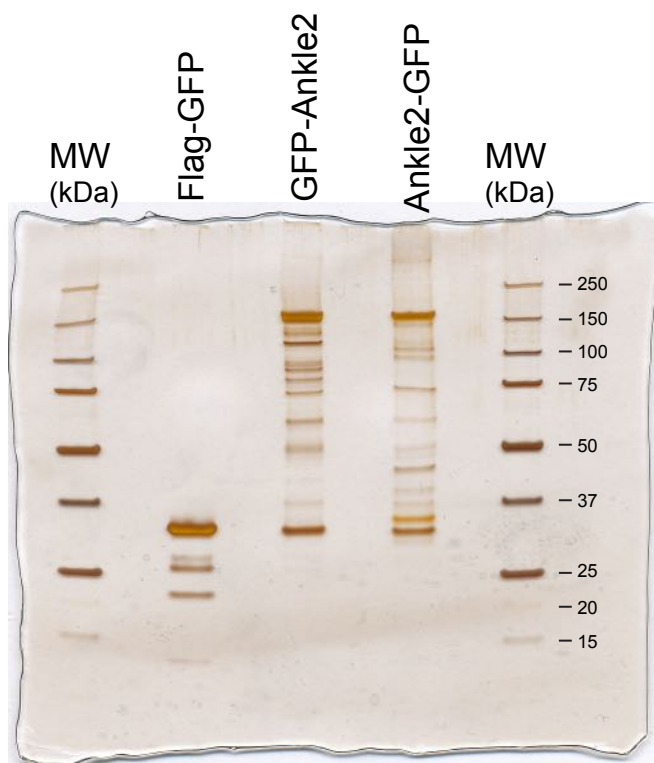

Supplement: fig1-figsupp1-data3 [file elife-104233-fig1-figsupp1-data3-v1.zip]

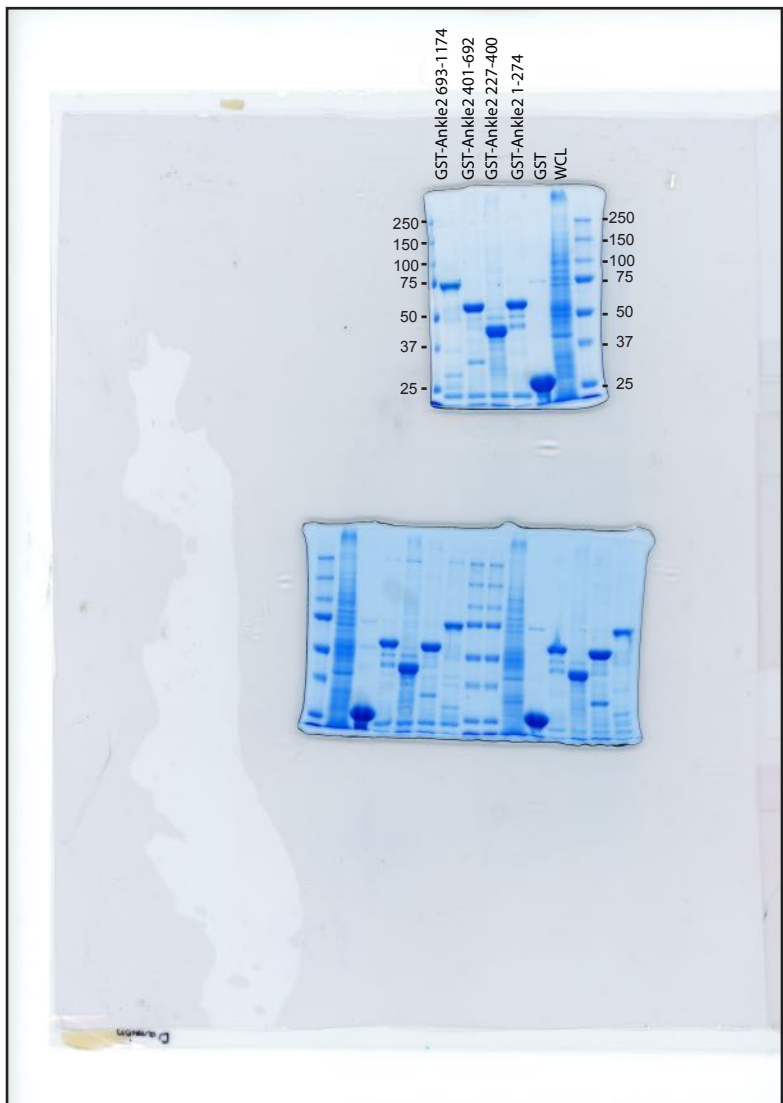

CB

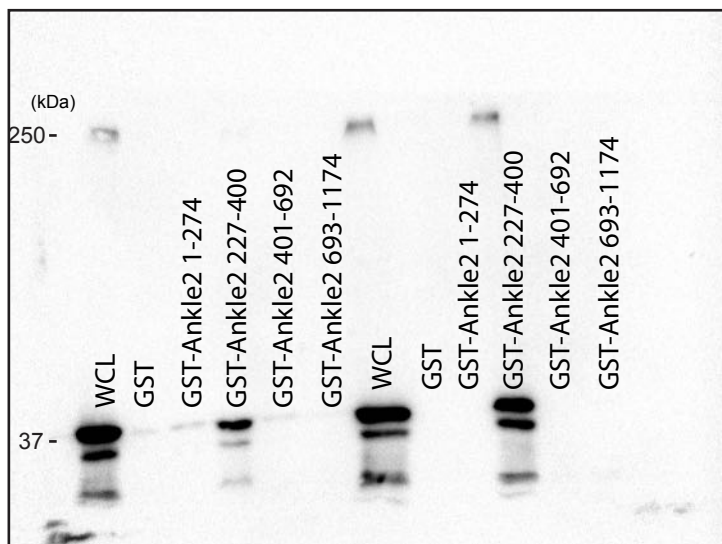

$\alpha$ -Mts

Supplement: fig1-figsupp1-data3 [file elife-104233-fig1-figsupp1-data3-v1.zip]

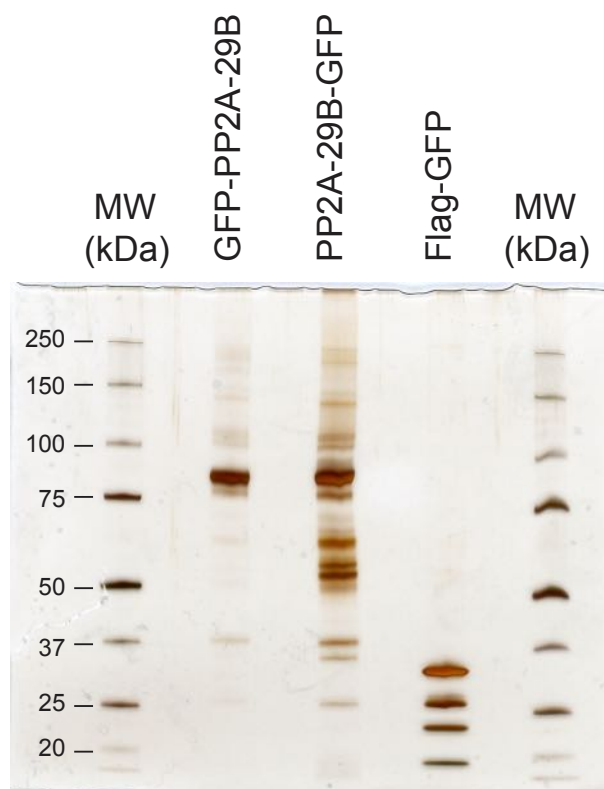

Supplement: fig1-figsupp1-data3 [file elife-104233-fig1-figsupp1-data3-v1.zip]

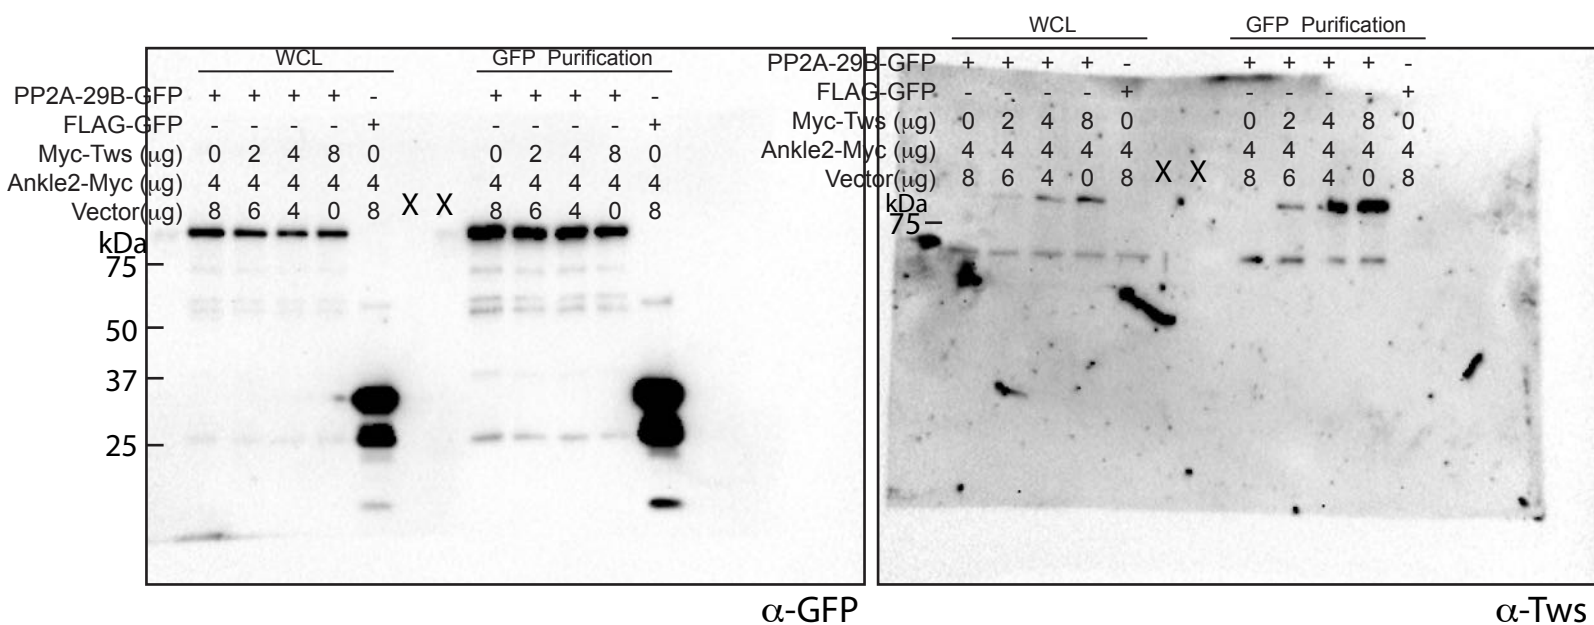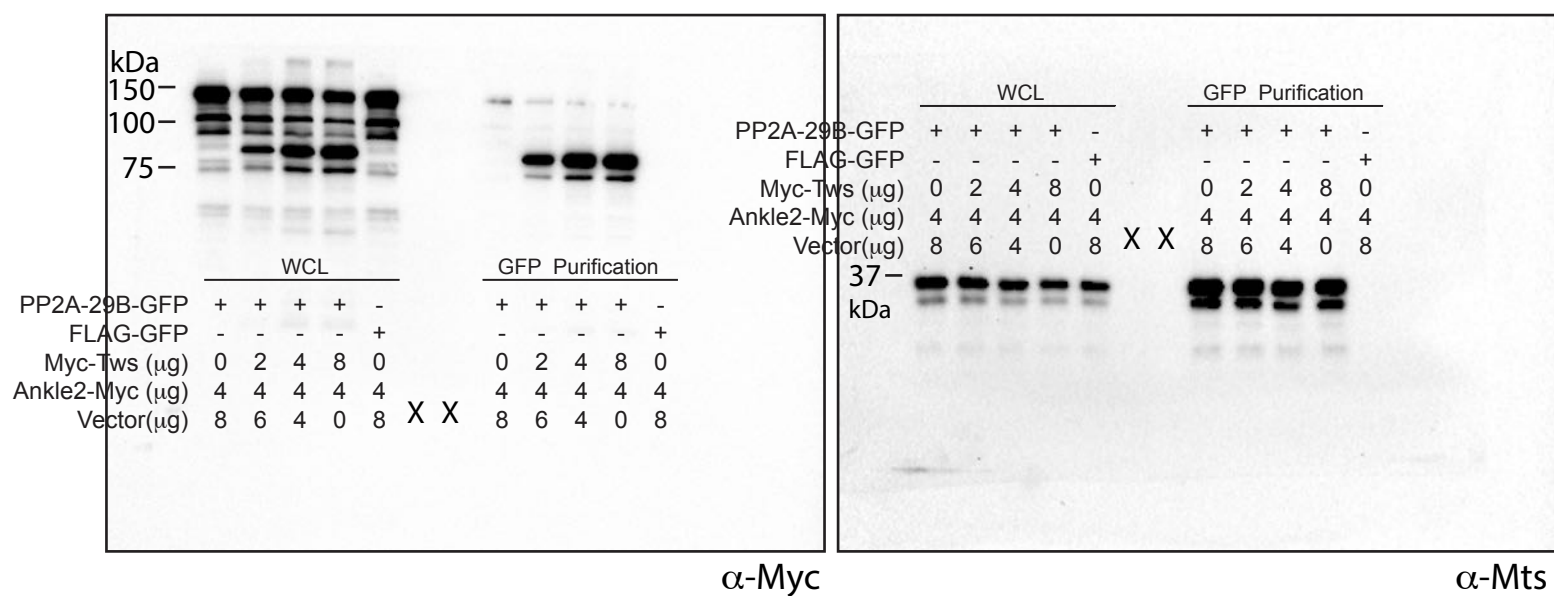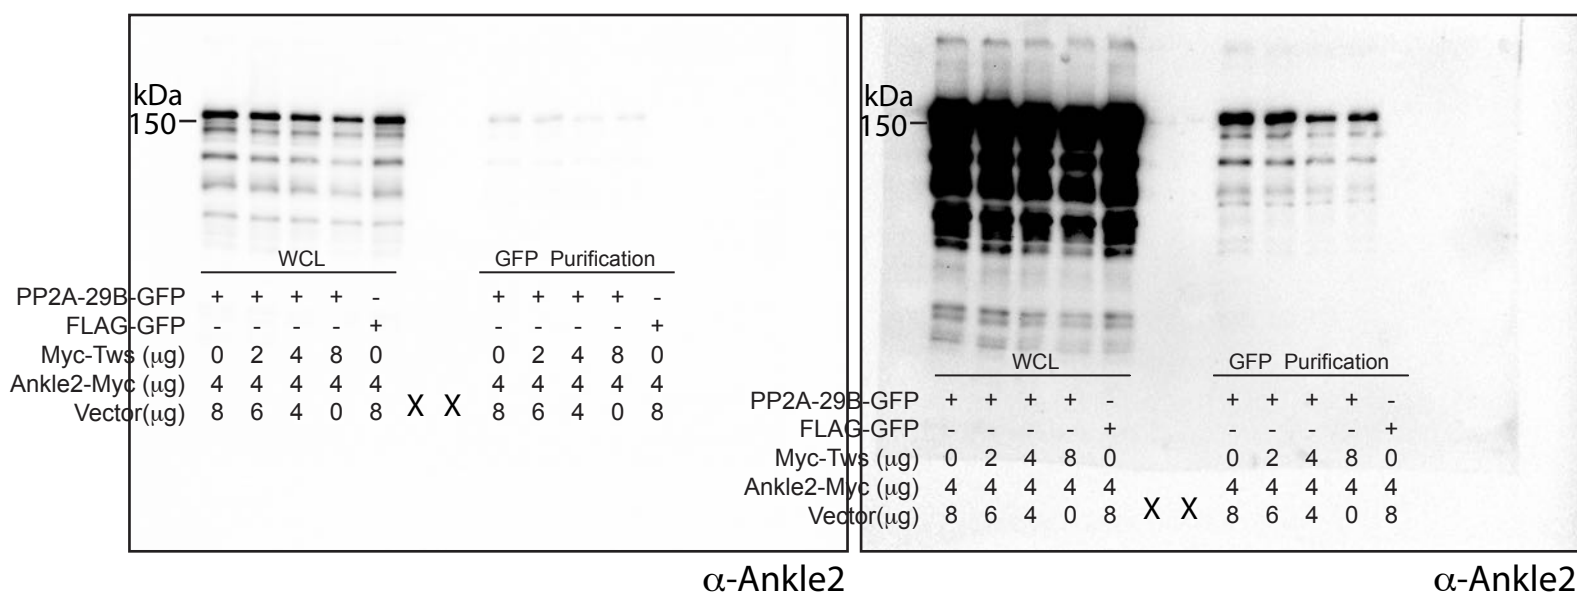

Supplement: fig2-data3 [file elife-104233-fig2-data3-v1.zip]

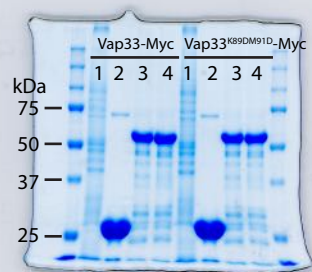

1: WCL  
2: GST  
3: GST-Ankle2 910-1174  
4: GST-Ankle2 910-1174+Fm

CB

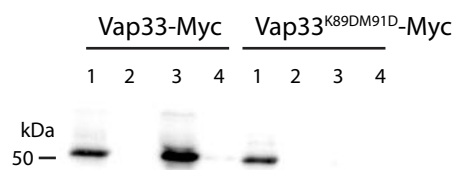

1: WCL  
2: GST  
3: GST-Ankle2 910-1174  
4: GST-Ankle2 910-1174+Fm

$\alpha$ -Myc

Supplement: fig4-data1 [file elife-104233-fig4-data1-v1.zip]

WCL

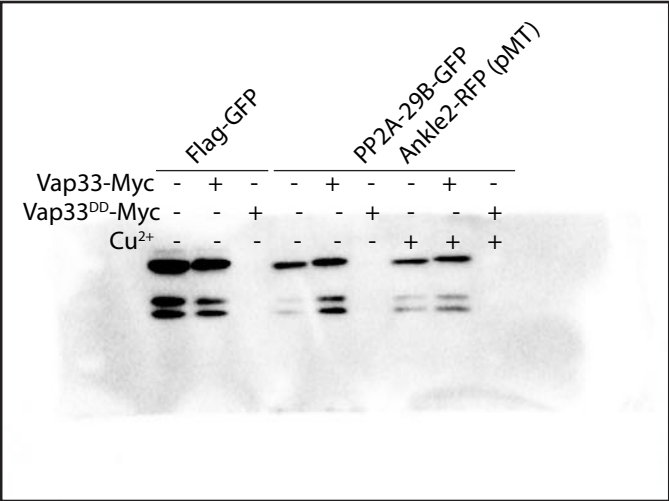

GFP purification

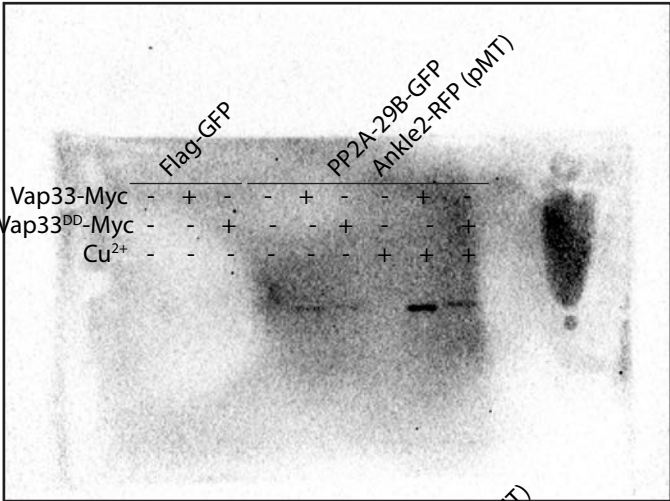

α-Myc

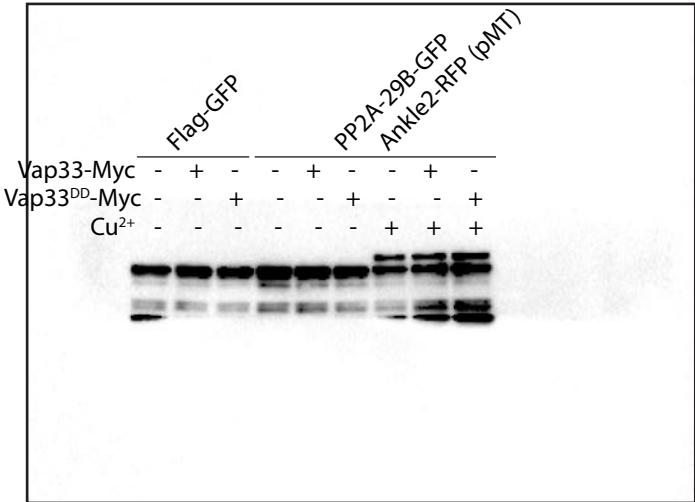

α-Ankle2

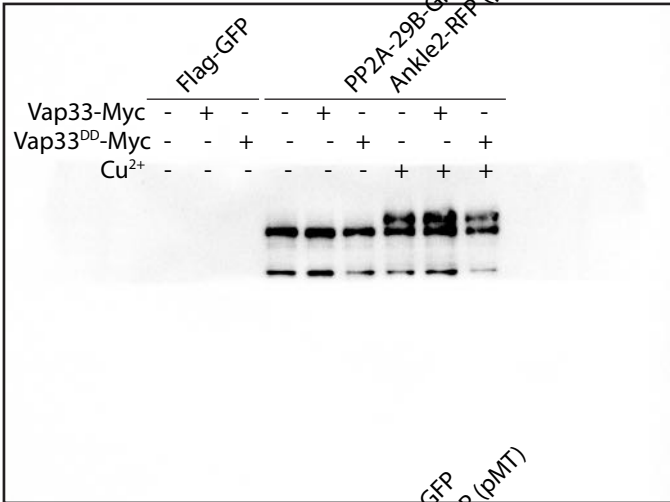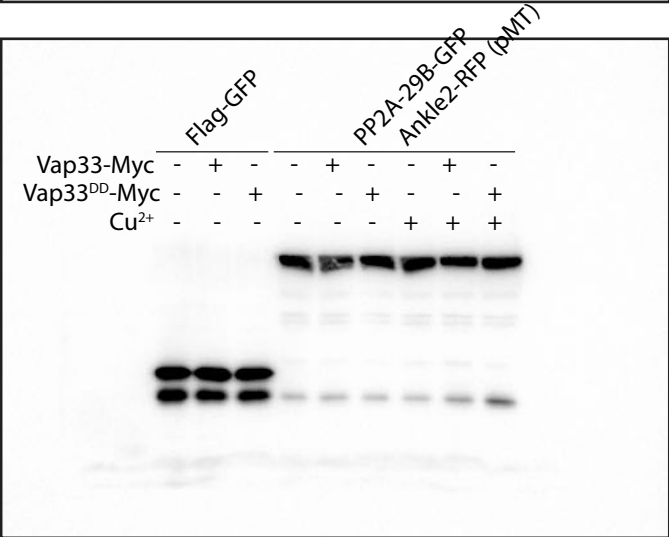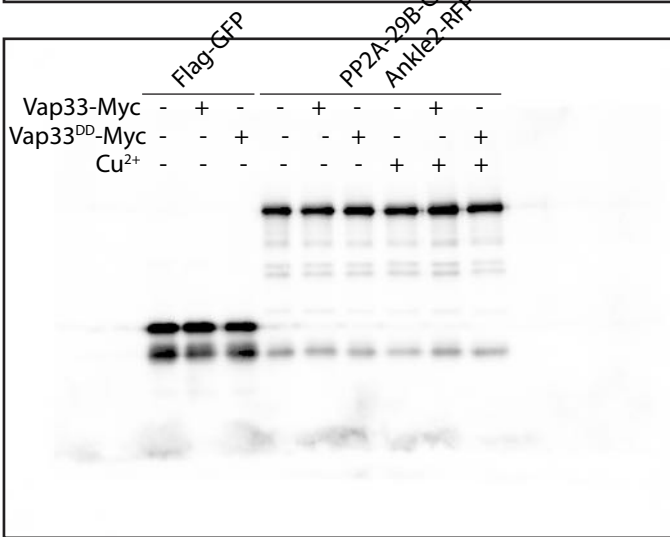

α-GFP

Supplement: fig4-figsupp1-data1 [file elife-104233-fig4-figsupp1-data1-v1.zip]

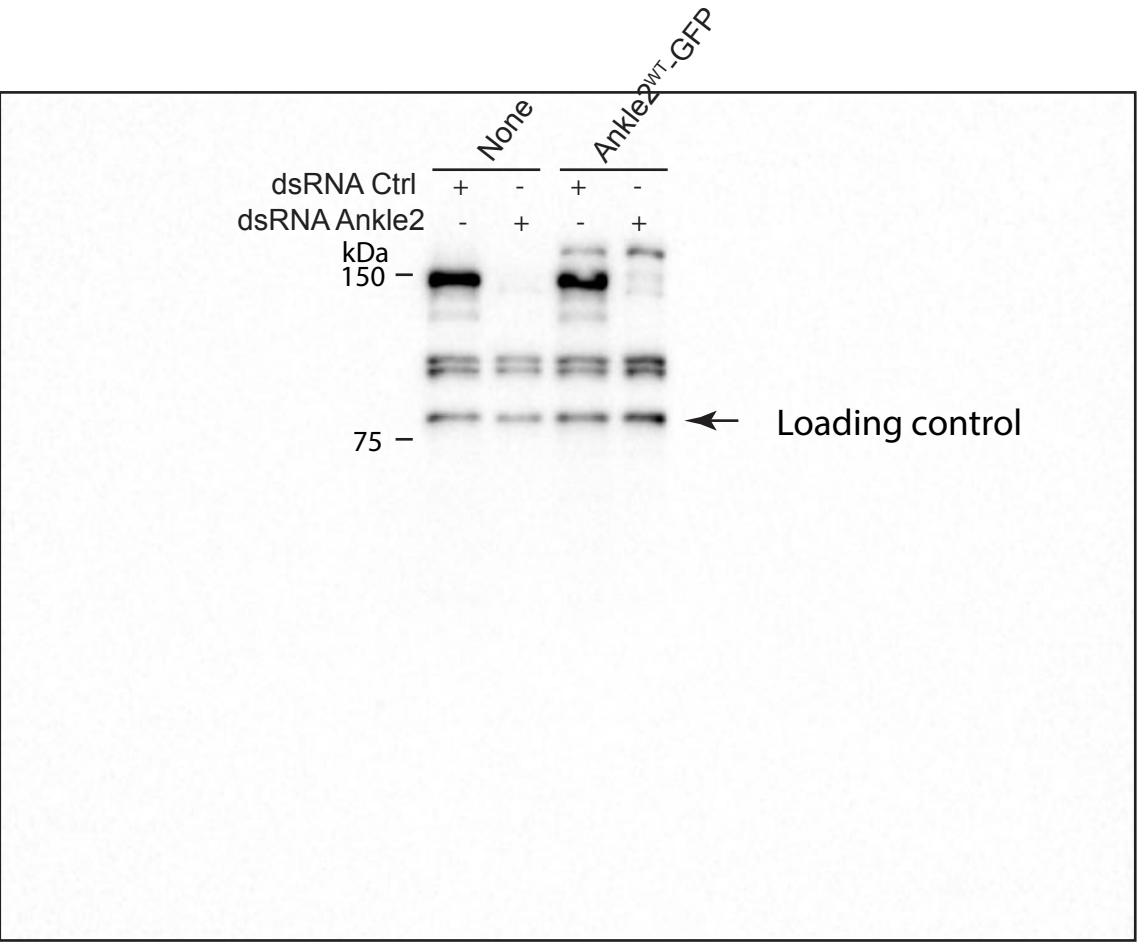

Supplement: fig5-data2 [file elife-104233-fig5-data2-v1.zip]

$\alpha$ -GFP

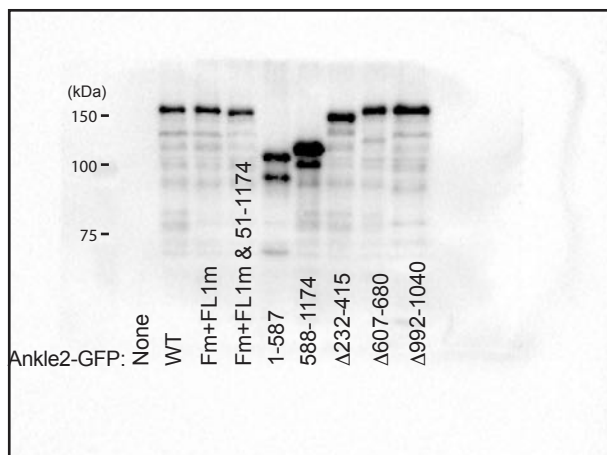

$\alpha$ -Tubulin

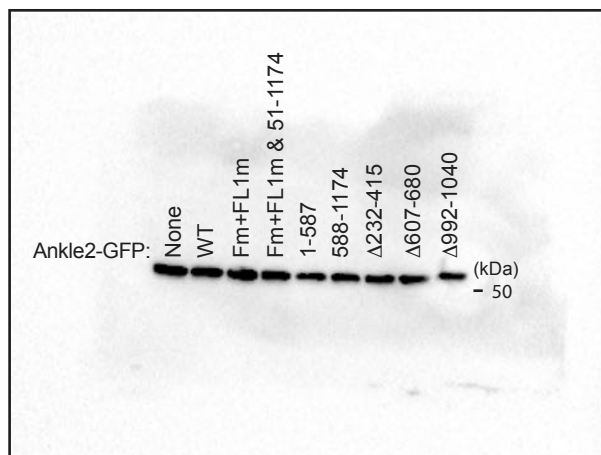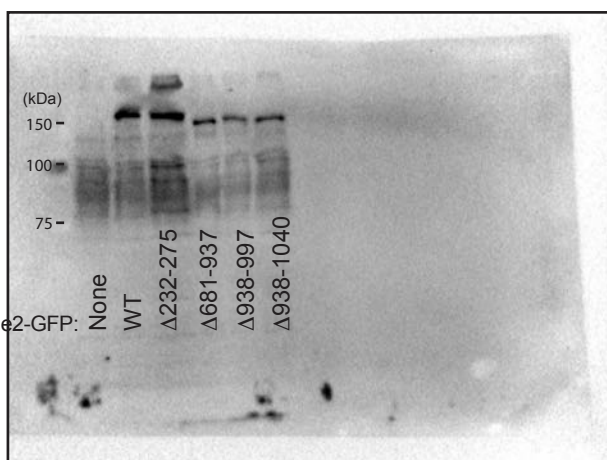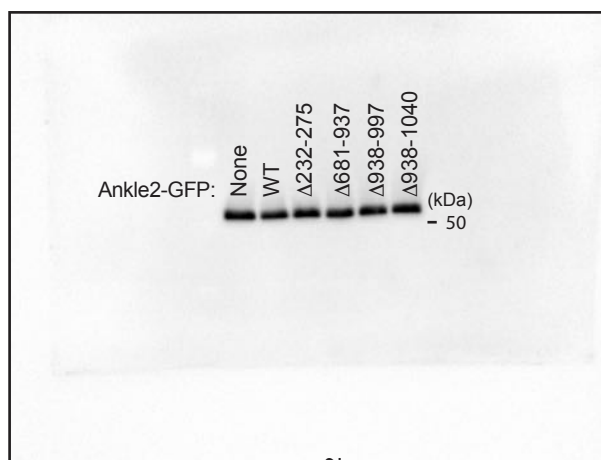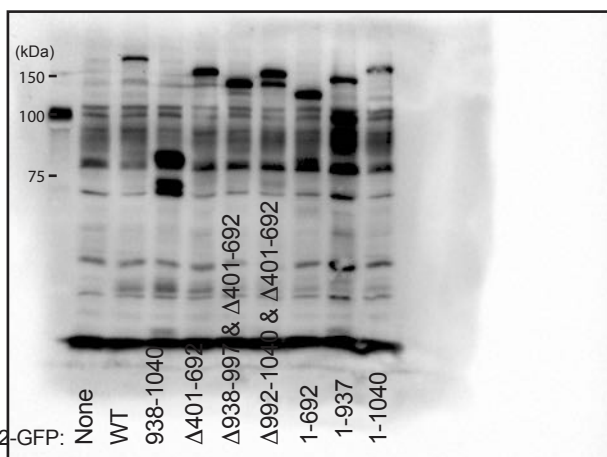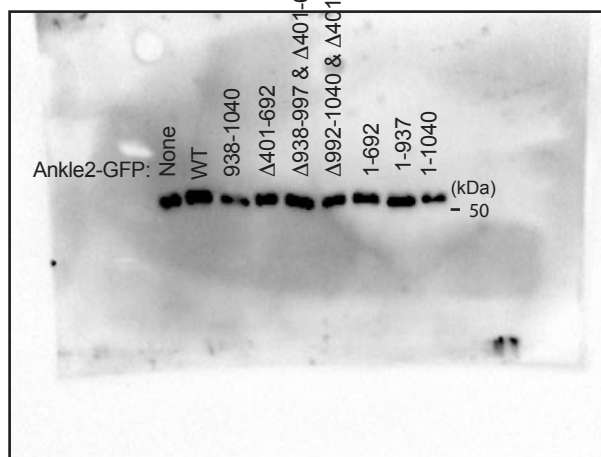

Ankle2-GFP:

Supplement: fig5-figsupp1-data2 [file elife-104233-fig5-figsupp1-data2-v1.zip]

phostag+α-BAF

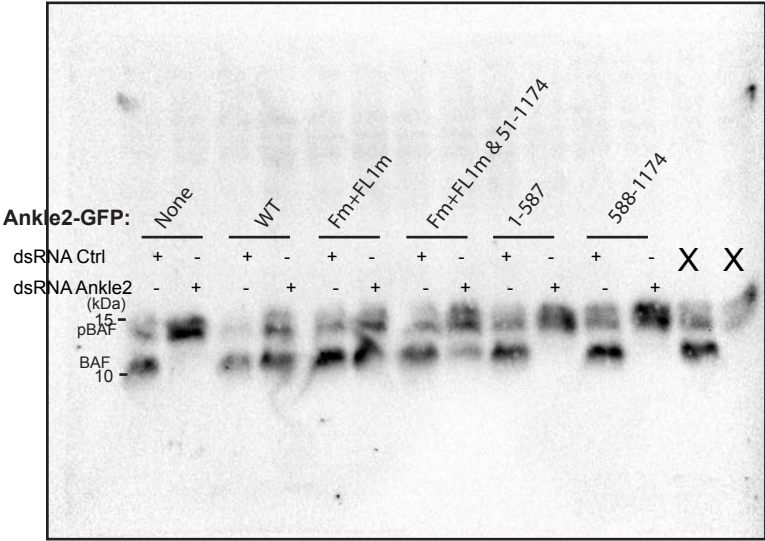

phostag+α-BAF

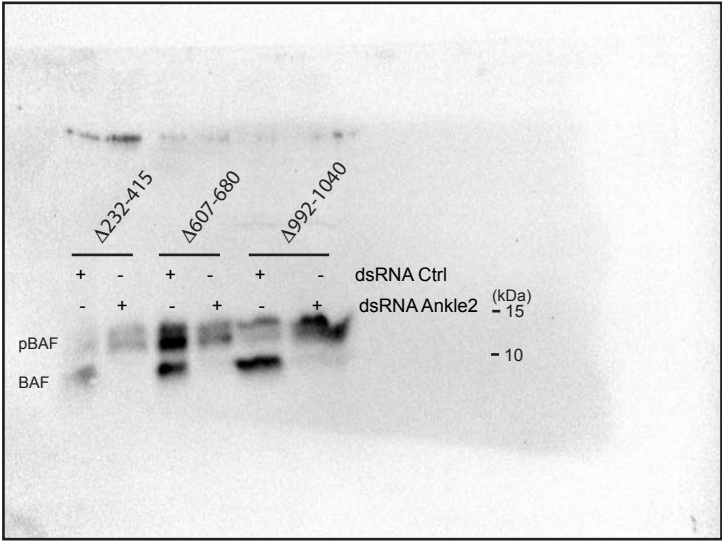

phostag+α-BAF

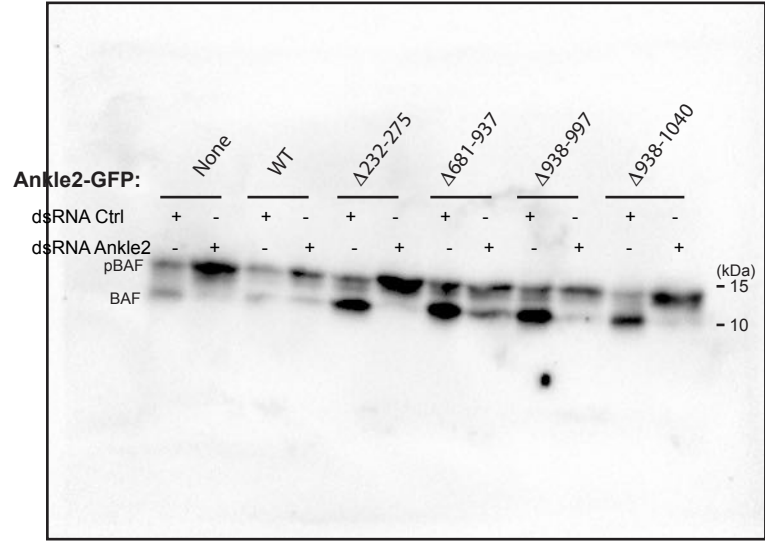

phostag+α-BAF

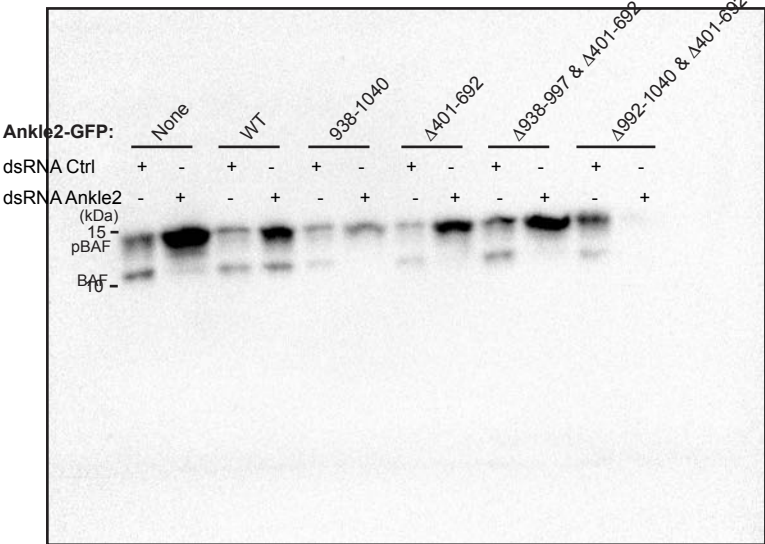

phostag+α-BAF

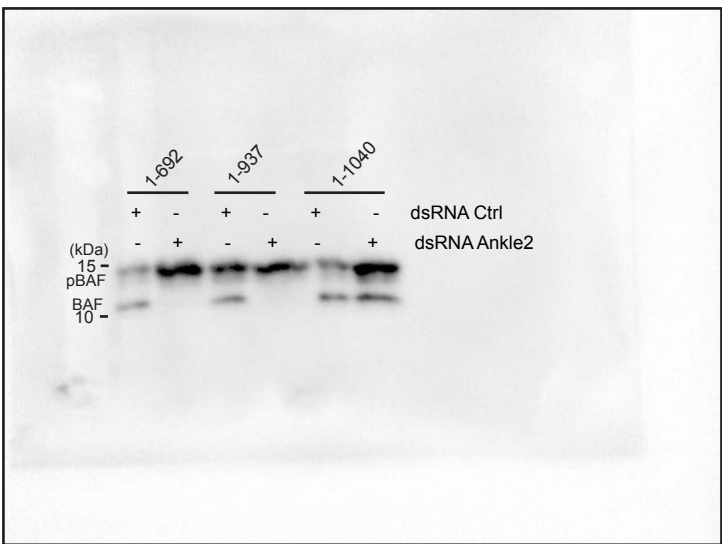

Supplement: fig5-figsupp1-data2 [file elife-104233-fig5-figsupp1-data2-v1.zip]

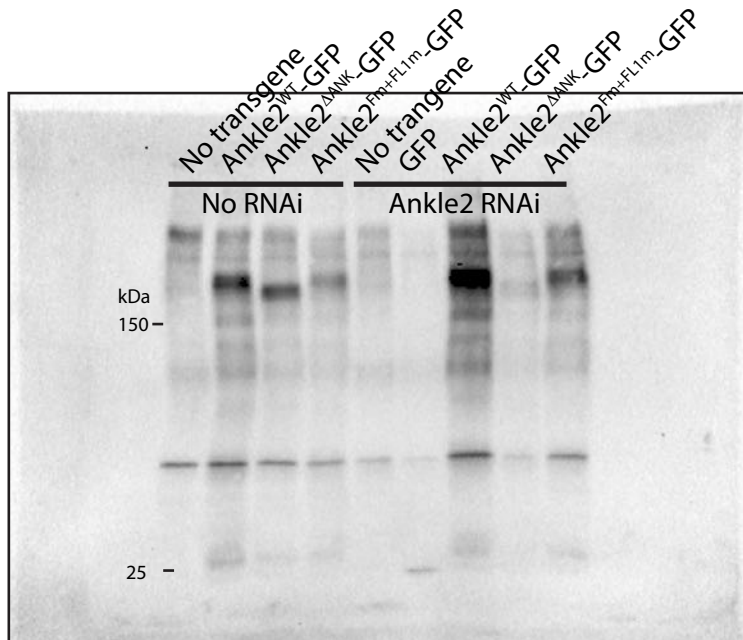

α-GFP

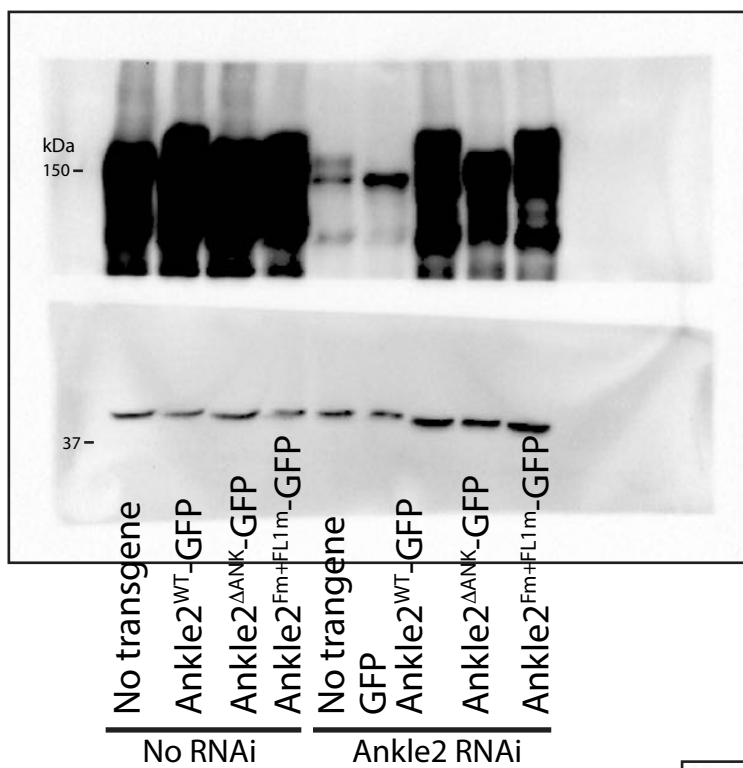

α-Actin

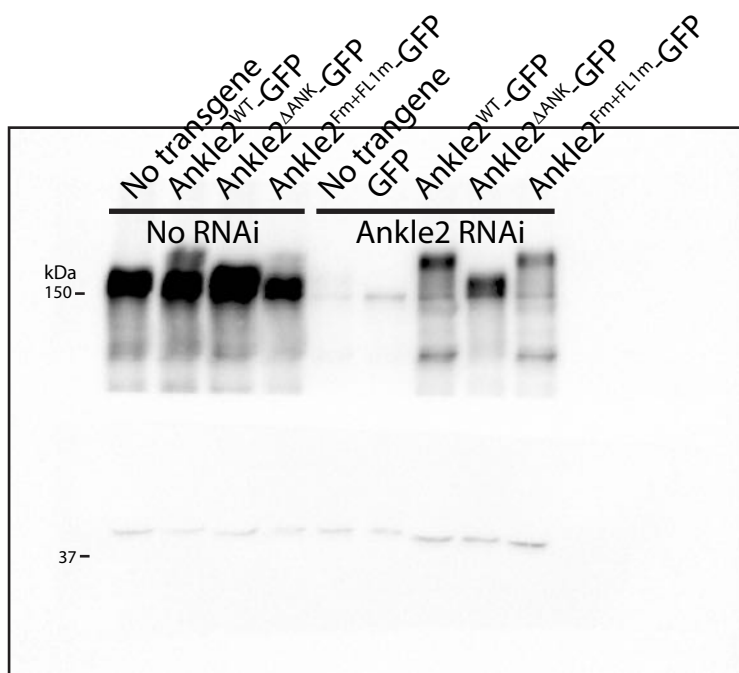

α-Ankle2

Supplement: fig6-figsupp1-data1 [file elife-104233-fig6-figsupp1-data1-v1.zip]

Mat $\alpha$ 4>

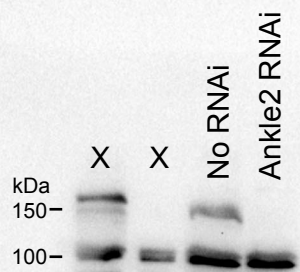

$\alpha$ -Ankle2

Supplement: fig7-figsupp1-data2 [file elife-104233-fig7-figsupp1-data2-v1.zip]
